# Supplementary material for: Collision-induced dissociation of sodiated glucose and identification of anomeric configuration
Source: Royal Society of Chemistry journal article supplement (doi:10.1039/c7cp02393f), 2017-01-01
Supplement: c7cp02393f1.pdf [file c7cp02393f1.pdf]

Supplementary material

## **Collision-Induced Dissociation of Sodiated Glucose and Identification of Anomeric Configuration**

Jien-Lian Chen,<sup>1</sup> Hock Seng Ngua,<sup>1</sup> Po-Jen Hsu,<sup>1</sup> Shang-Ting Tsai,<sup>1</sup> Chia Yen  
Liew,<sup>1</sup> Jer-Lai Kuo,<sup>1</sup> Wei-Ping Hu,<sup>2</sup> and Chi-Kung Ni\*<sup>1,3</sup>

<sup>1</sup>Institute of Atomic and Molecular Sciences, Academia Sinica, P. O. Box 23-166,  
Taipei 10617, Taiwan

<sup>2</sup>Department of Chemistry and Biochemistry, National Chung Cheng University,  
Chia-Yi 621, Taiwan

<sup>3</sup>Department of Chemistry, National Tsing Hua University, Hsinchu 30013, Taiwan.

\*Email address: ckni@po.iams.sinica.edu.tw

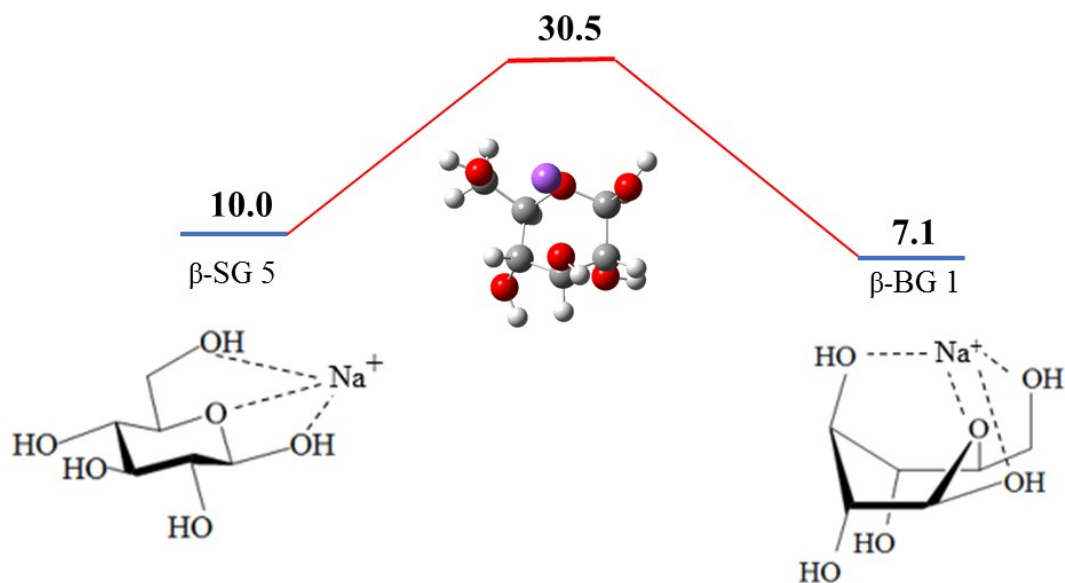

Figure S1. The barrier (kJ/mol) for the change from sodiated  $\beta$ -glucose of chair conformation to sodiated  $\beta$ -glucose of boat conformation. The zero potential energy is set at the most stable conformer of sodiated  $\alpha$ -glucose ( $\beta$ -SG3, see Figure S2). B3LYP functional with the 6-311+G(d,p) basis set was used in calculations.

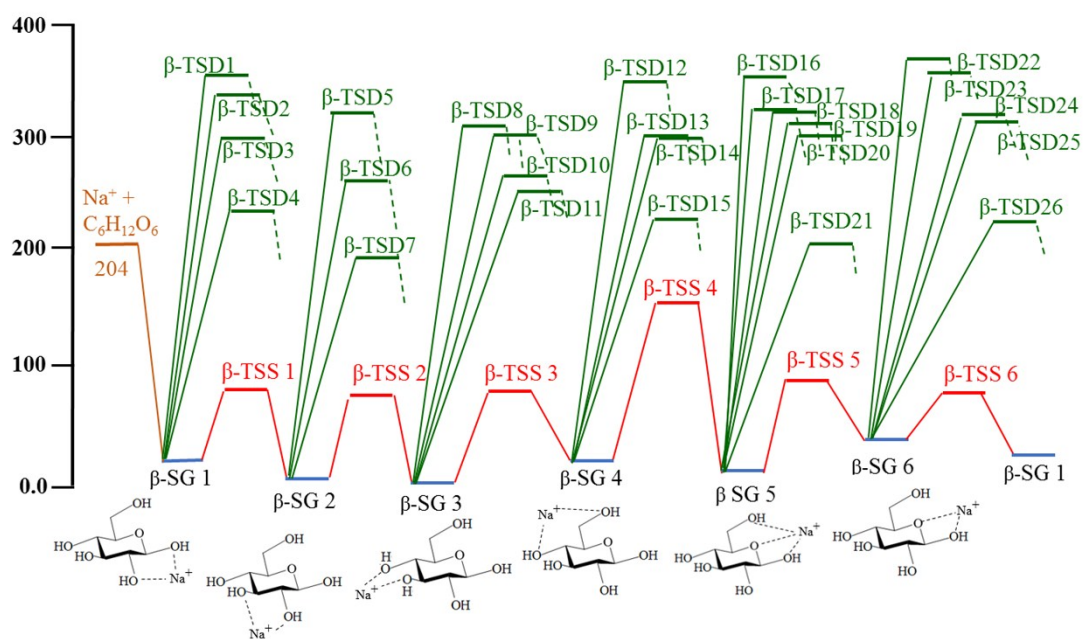

Figure S2. Geometries and relative energies (kJ/mol) of sodiated  $\beta$ -glucose with chair

conformation  ${}^4C_1$  (blue lines), sodium cation migration barriers (red lines), and dehydration reaction barriers (green lines). The energy levels of dehydration products are not shown. The zero potential energy is set at the most stable conformer  $\beta$ -SG3. B3LYP functional with the 6-311+G(d,p) basis set was used in calculations.

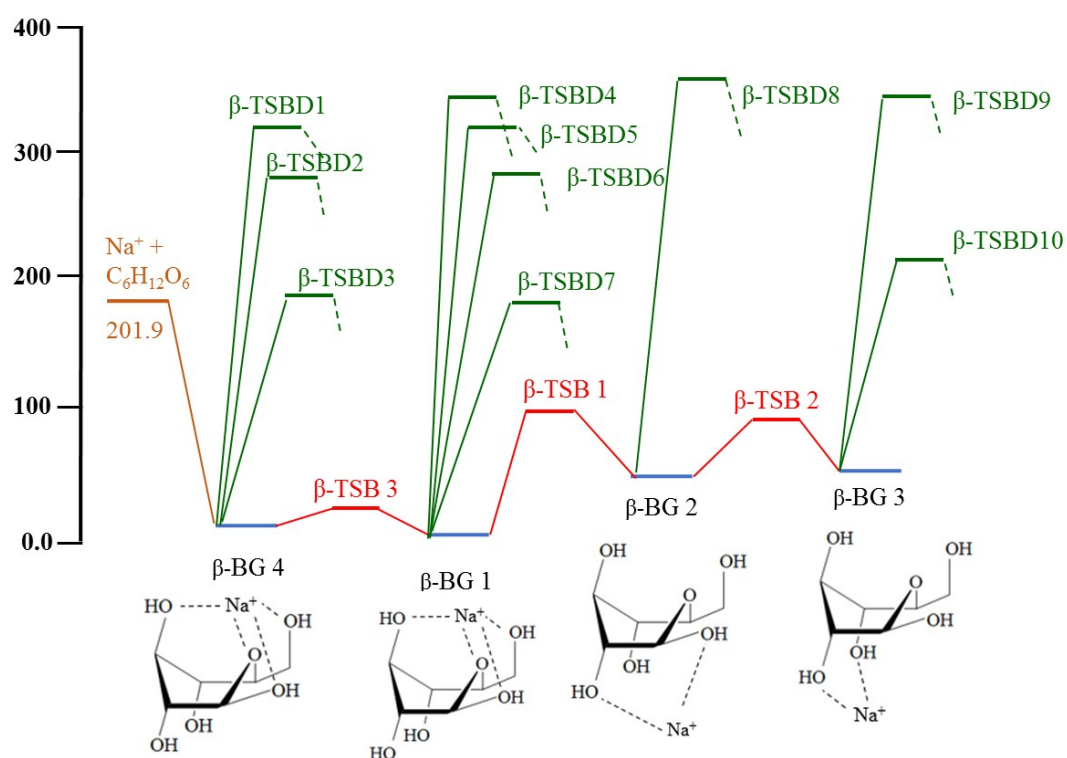

Figure S3. Geometries and relative energies (kJ/mol) of sodiated  $\beta$ -glucose with boat conformation  ${}^{0,3}B$  (blue lines), sodium cation migration barriers (red lines), and dehydration reaction barriers (green lines). The energy levels of dehydration products are not shown. The zero potential energy is set at the most stable conformer  $\beta$ -SG3. B3LYP functional with the 6-311+G(d,p) basis set was used in calculations.

Figure S4-1

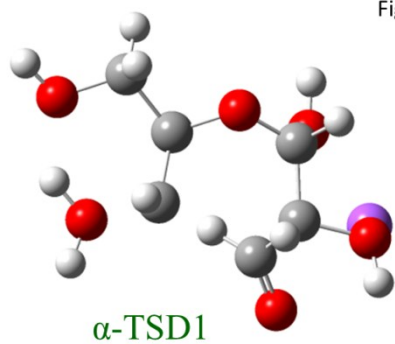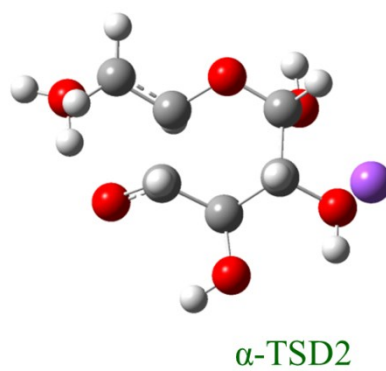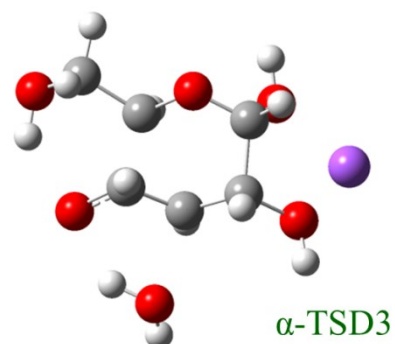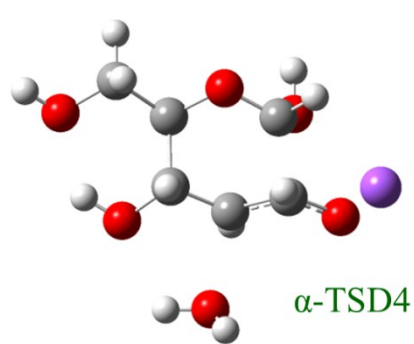

Figure S4-2

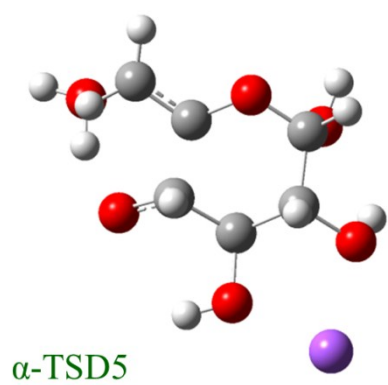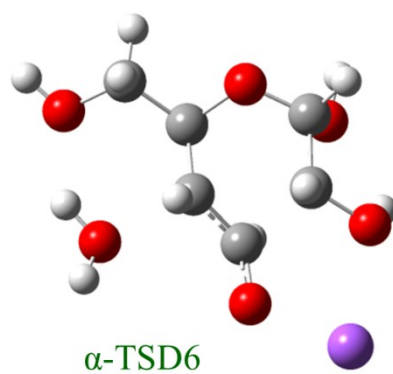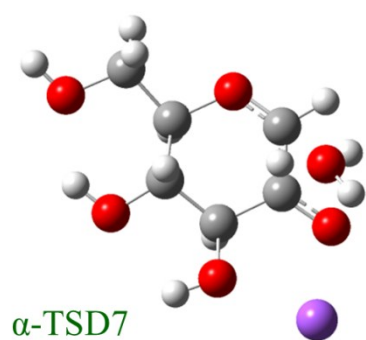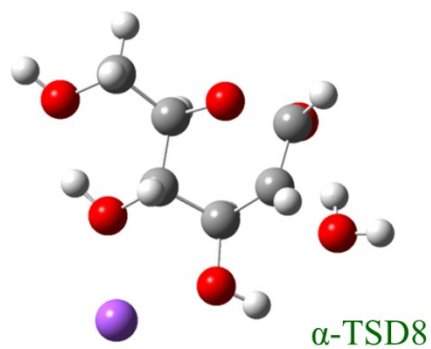

Figure S4-3

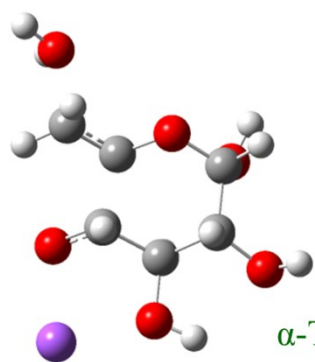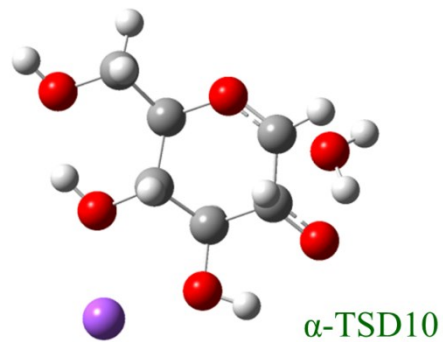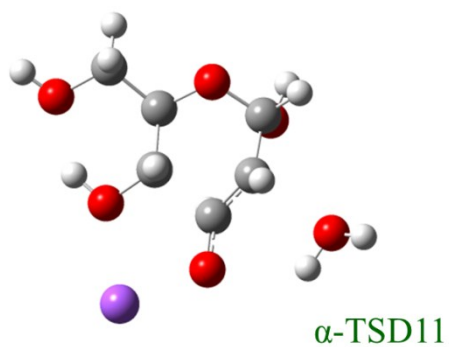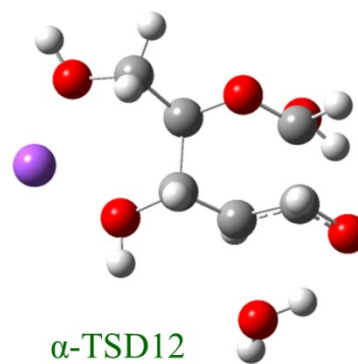

Figure S4-4

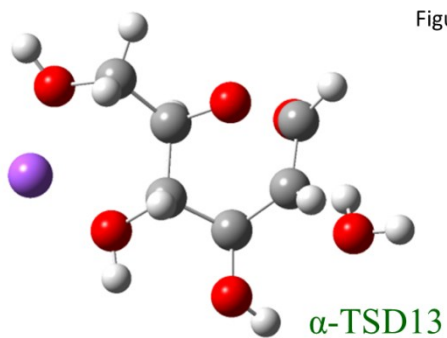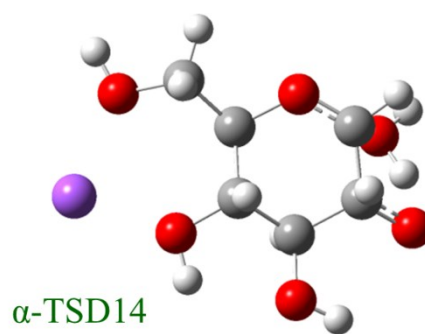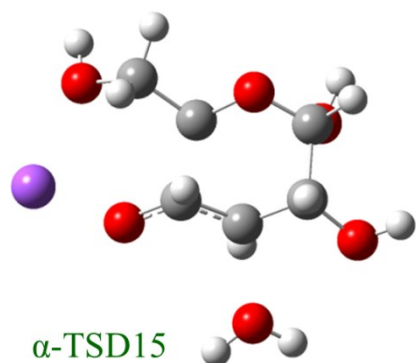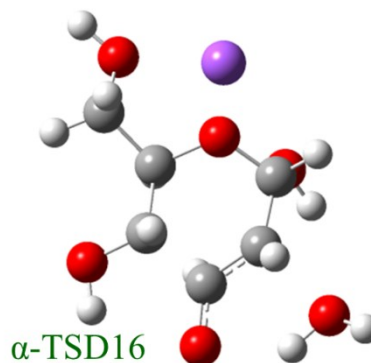

Figure S4-5

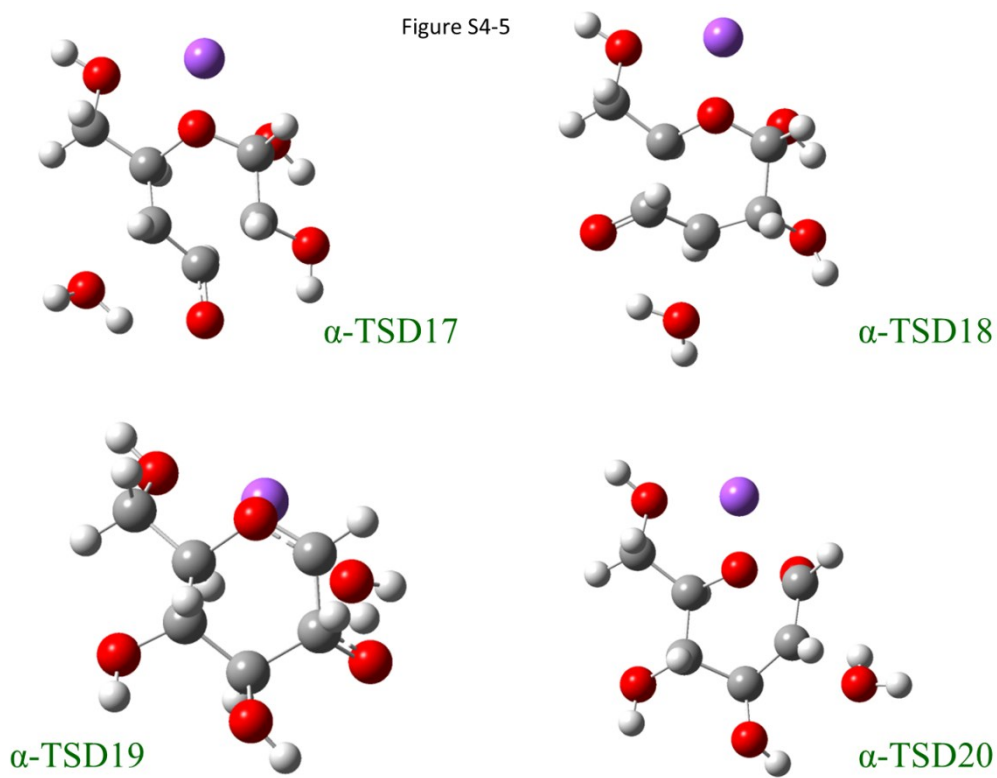

Figure S4-6

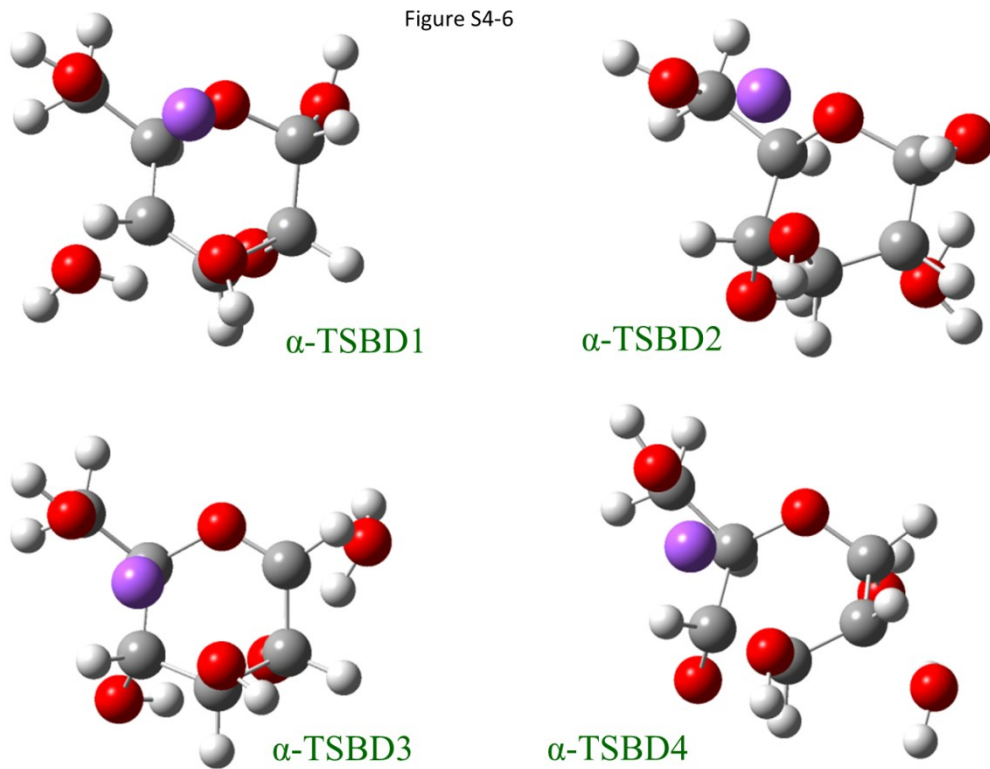

Figure S4-7

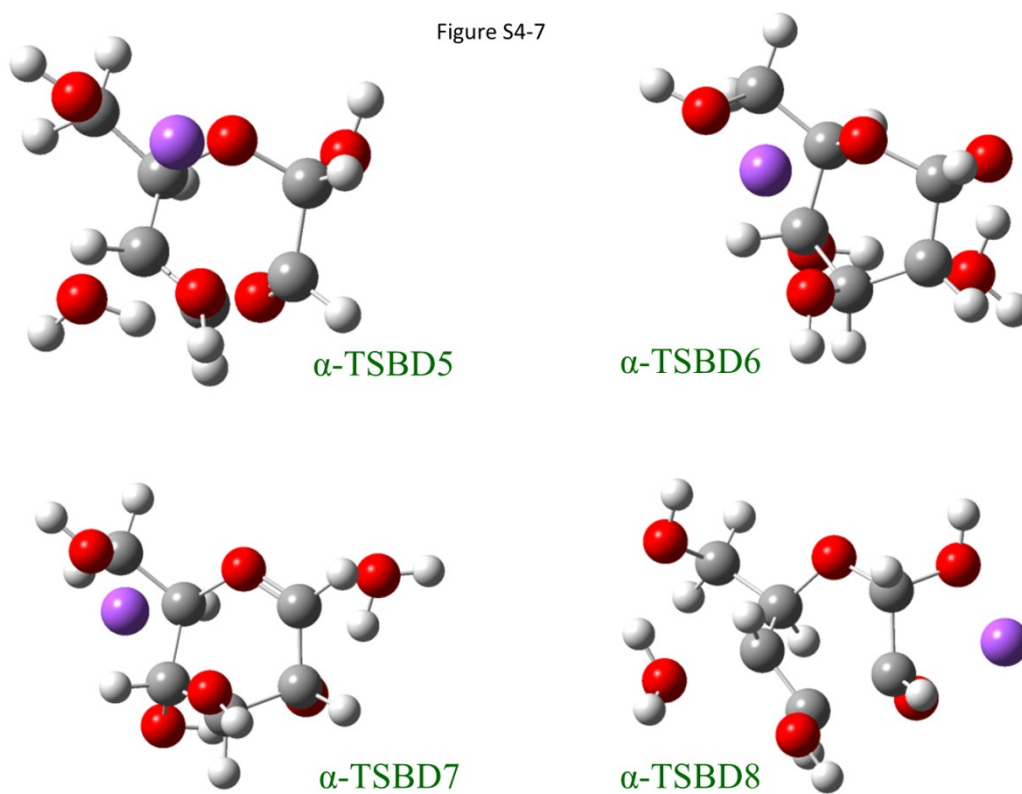

Figure S4-8

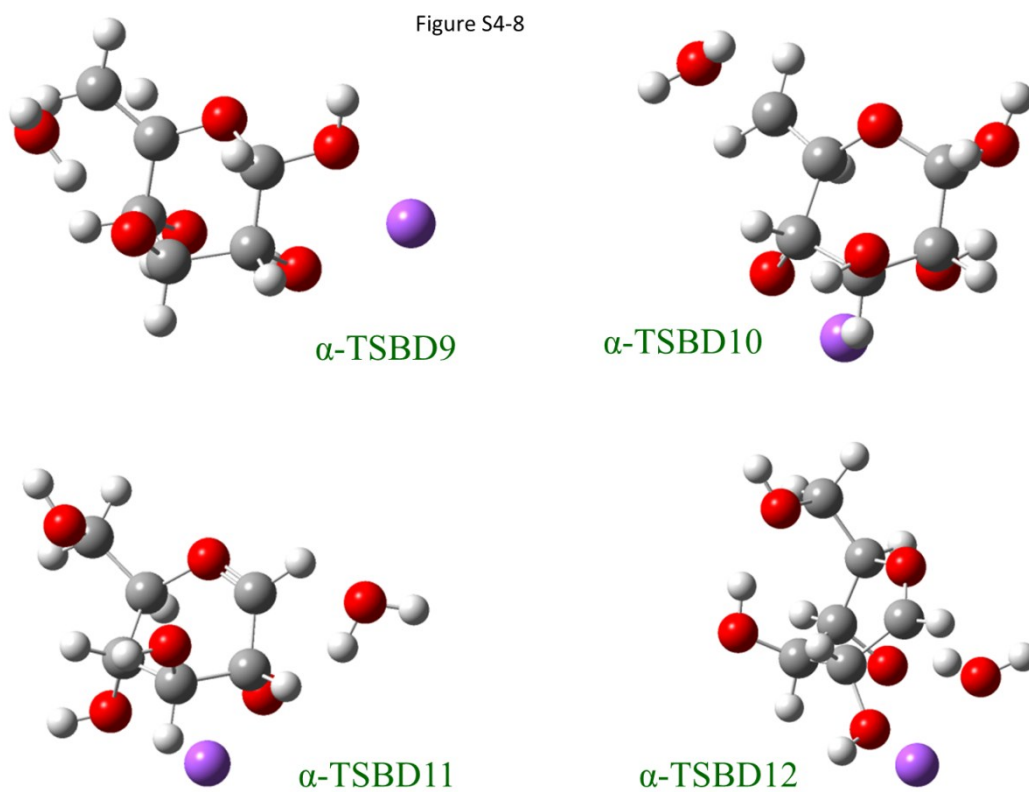

Figure S4. Transition state geometries of dehydration reactions of sodiated  $\alpha$ -glucose.

Figure S5-1

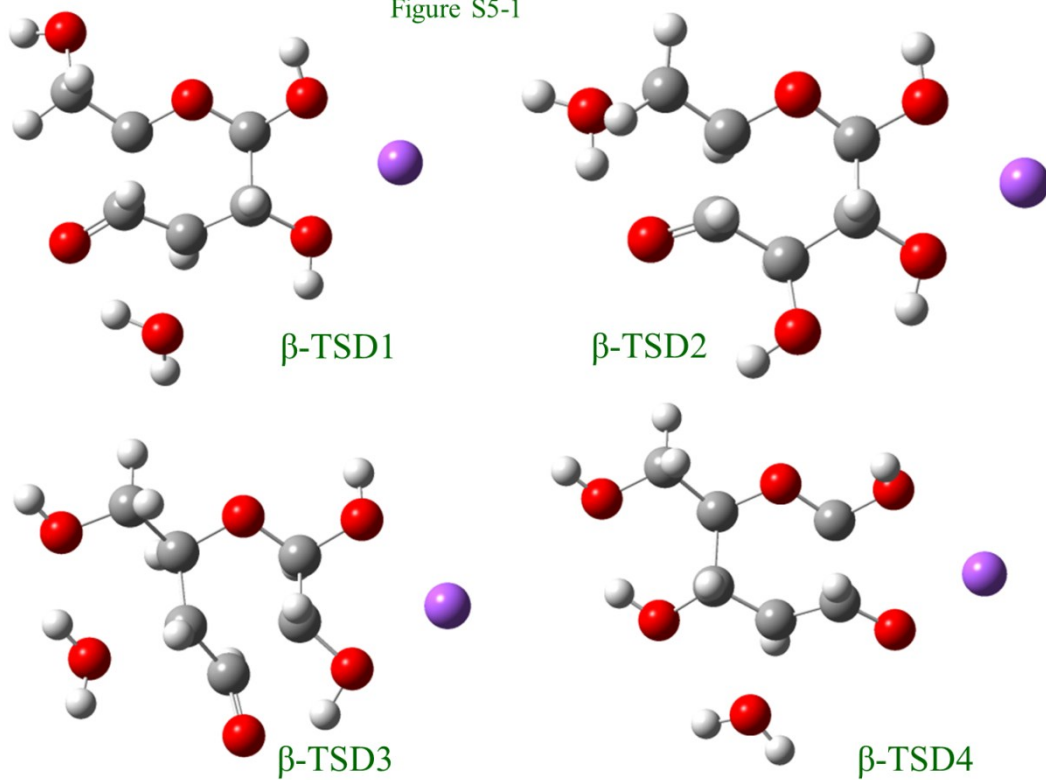

Figure S5-2

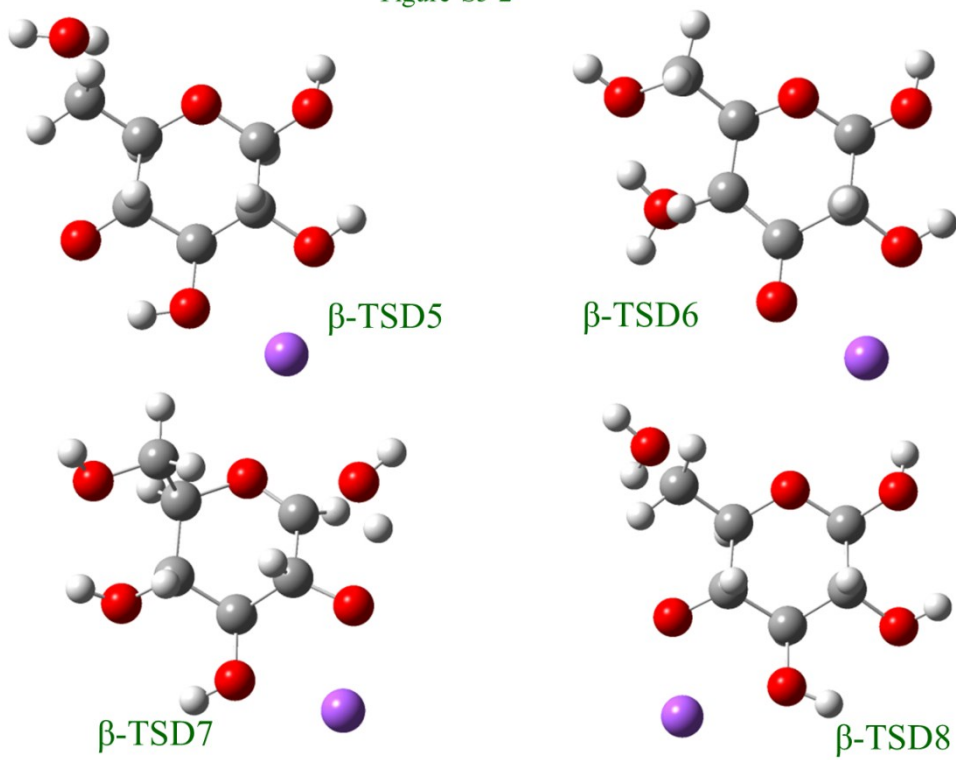



Figure S5-3

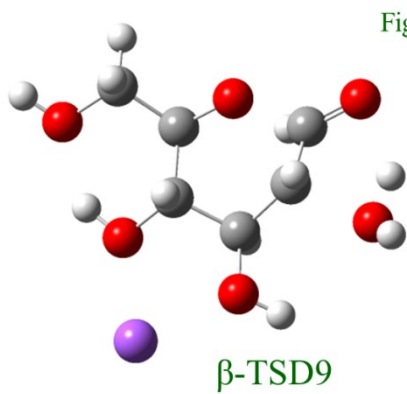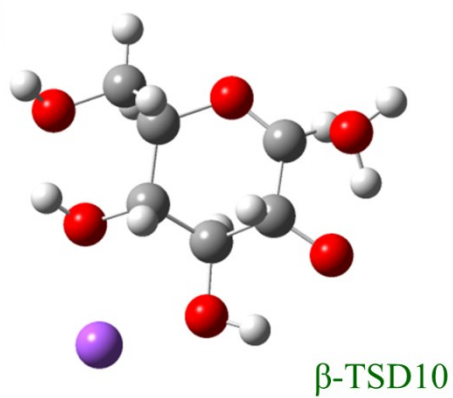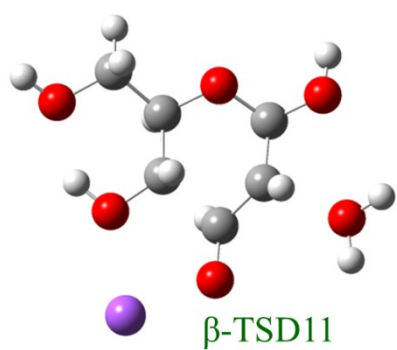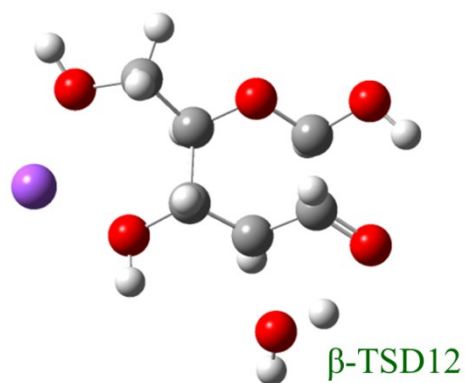

Figure S5-4

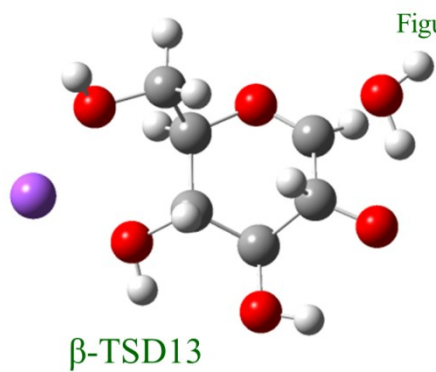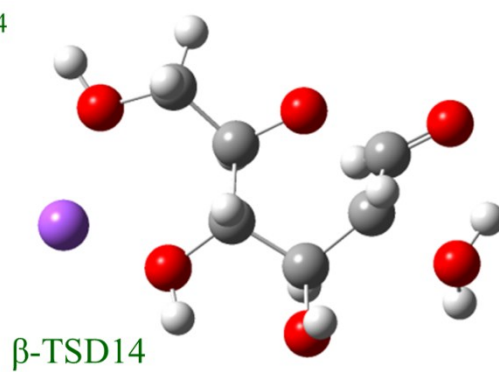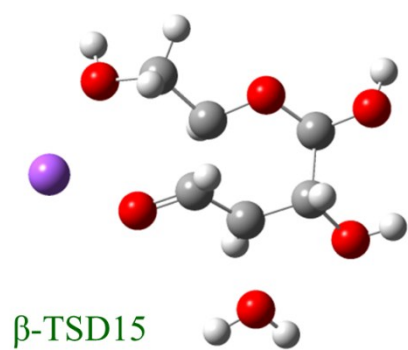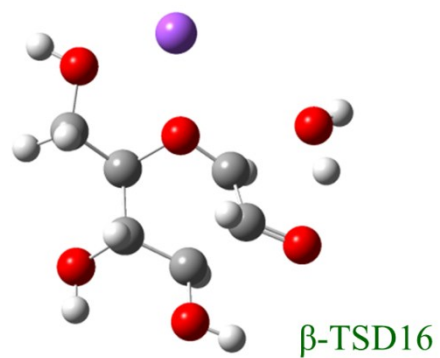

Figure S5-5

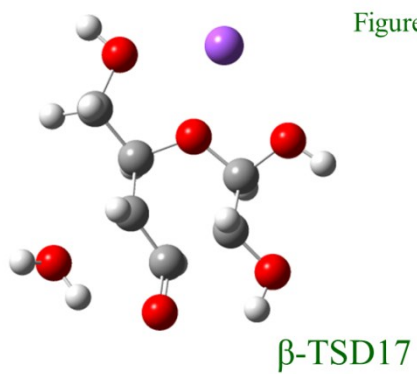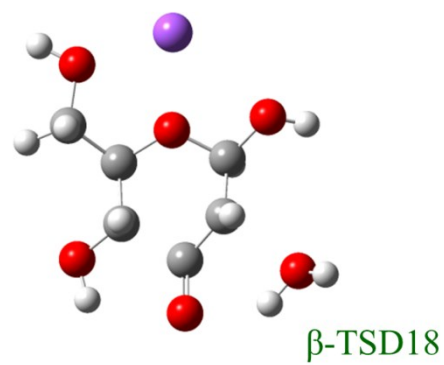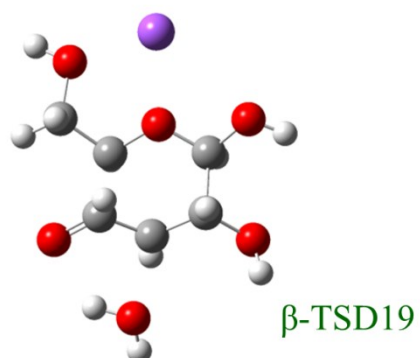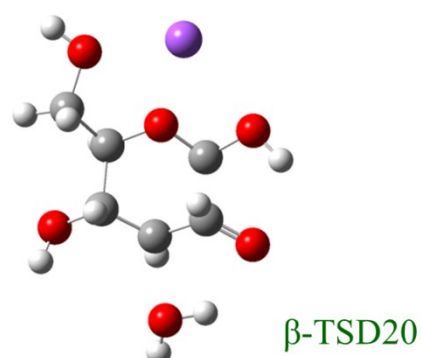

Figure S5-6

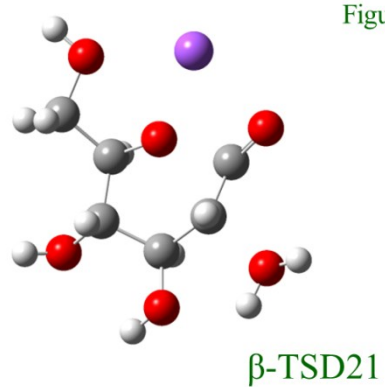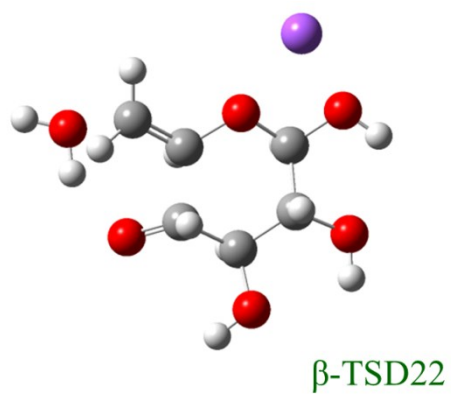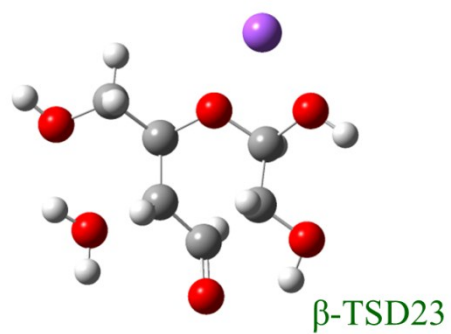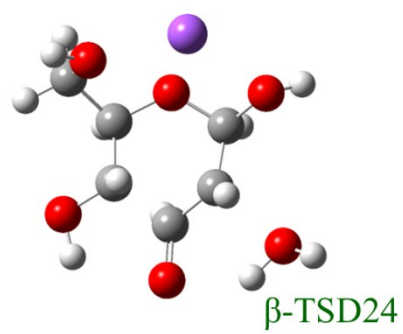

Figure S5-7

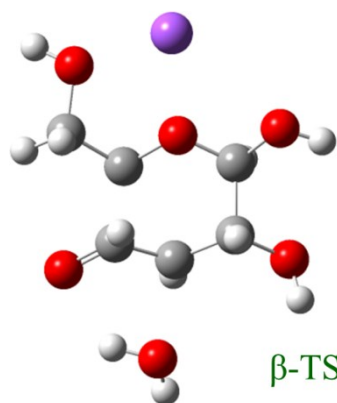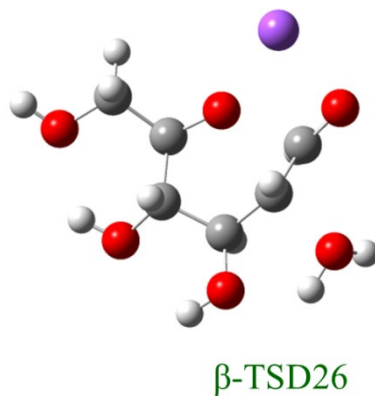

Figure S5-8

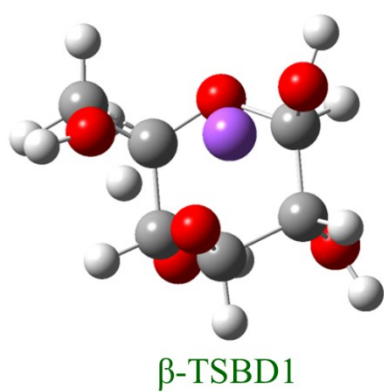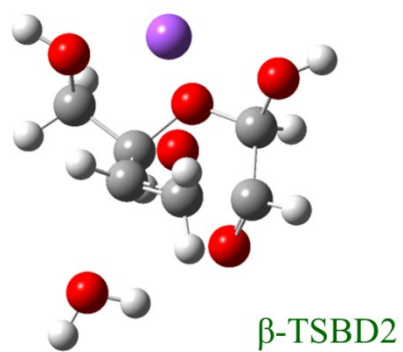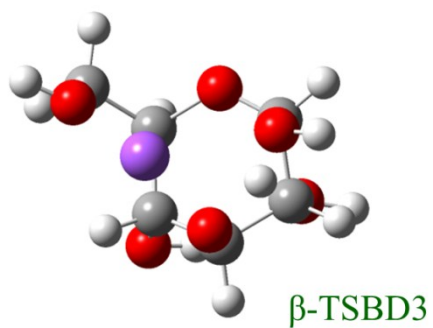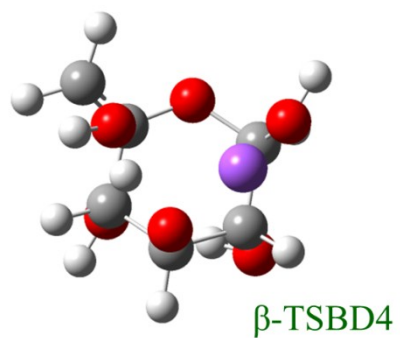

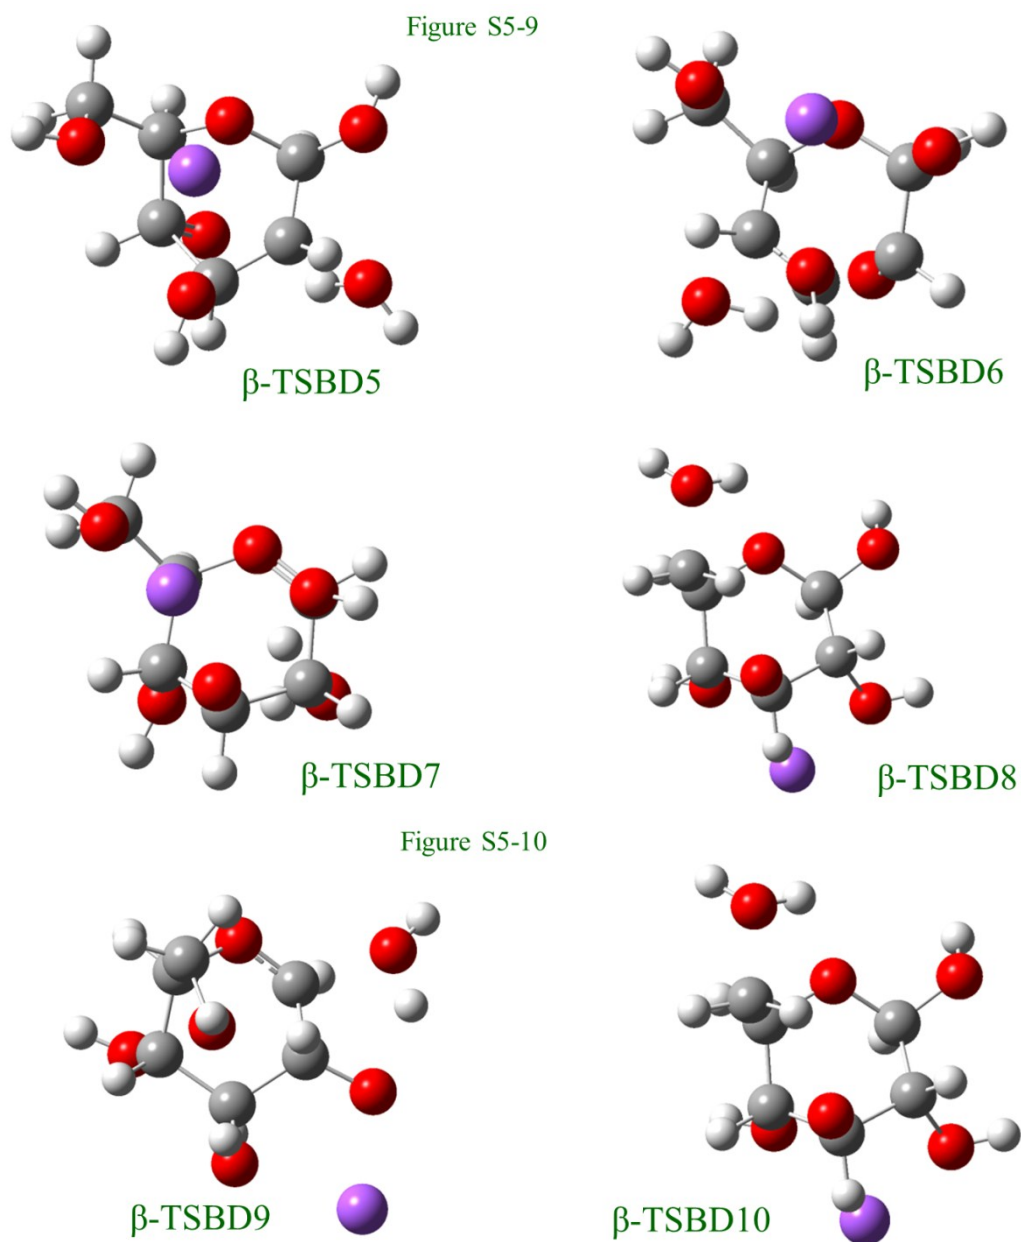

Figure S5. Transition state geometries of dehydration reactions of sodiated  $\beta$ -glucose.

${}^1C_4$   $\alpha$ -form

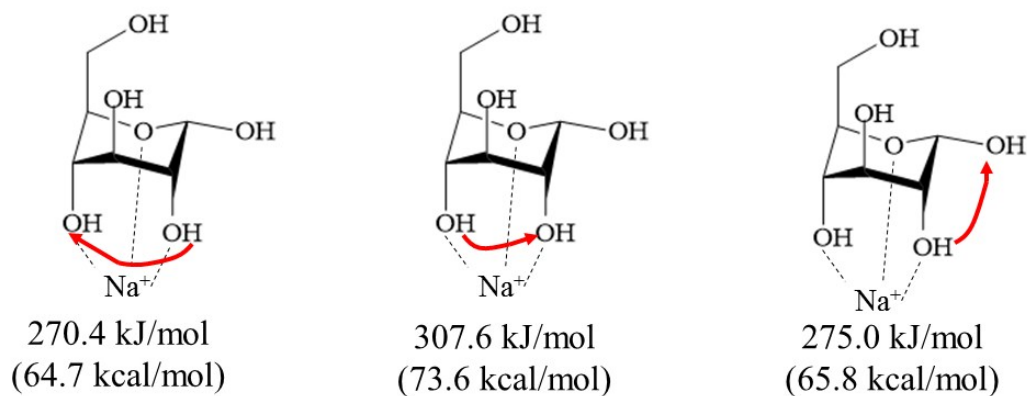

${}^1C_4$   $\beta$ -form

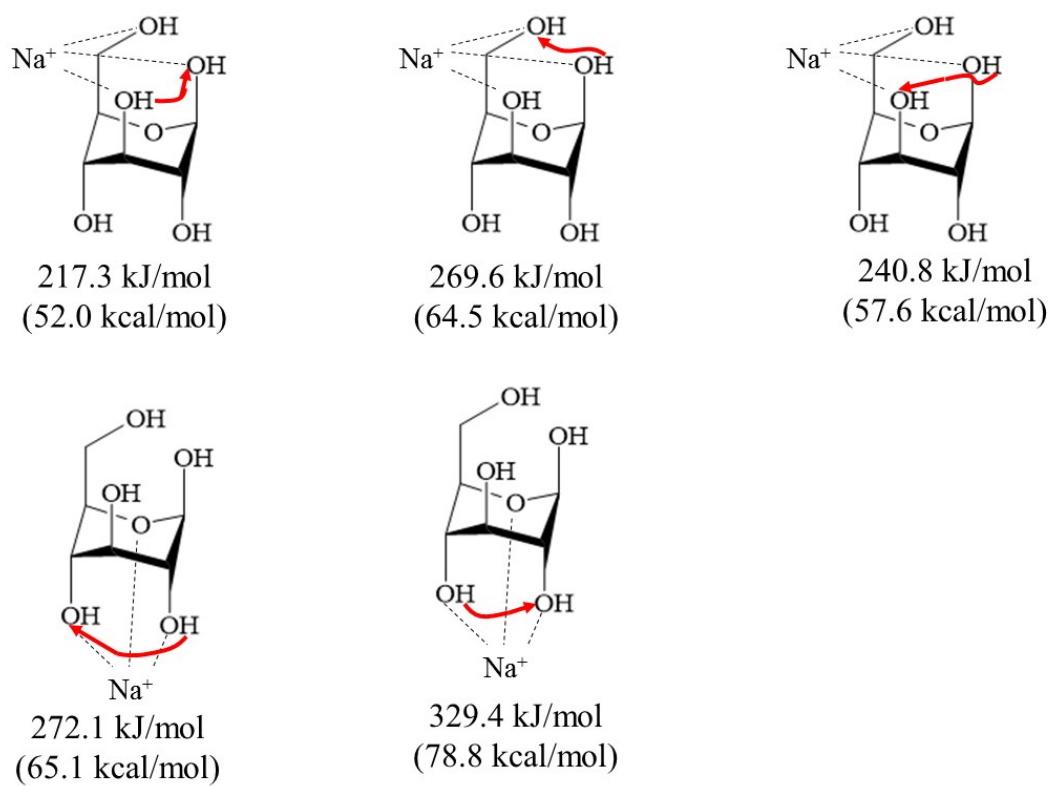

Figure S6. Energies of transition states for dehydration reaction of sodiated glucose with  ${}^1C_4$  conformation.

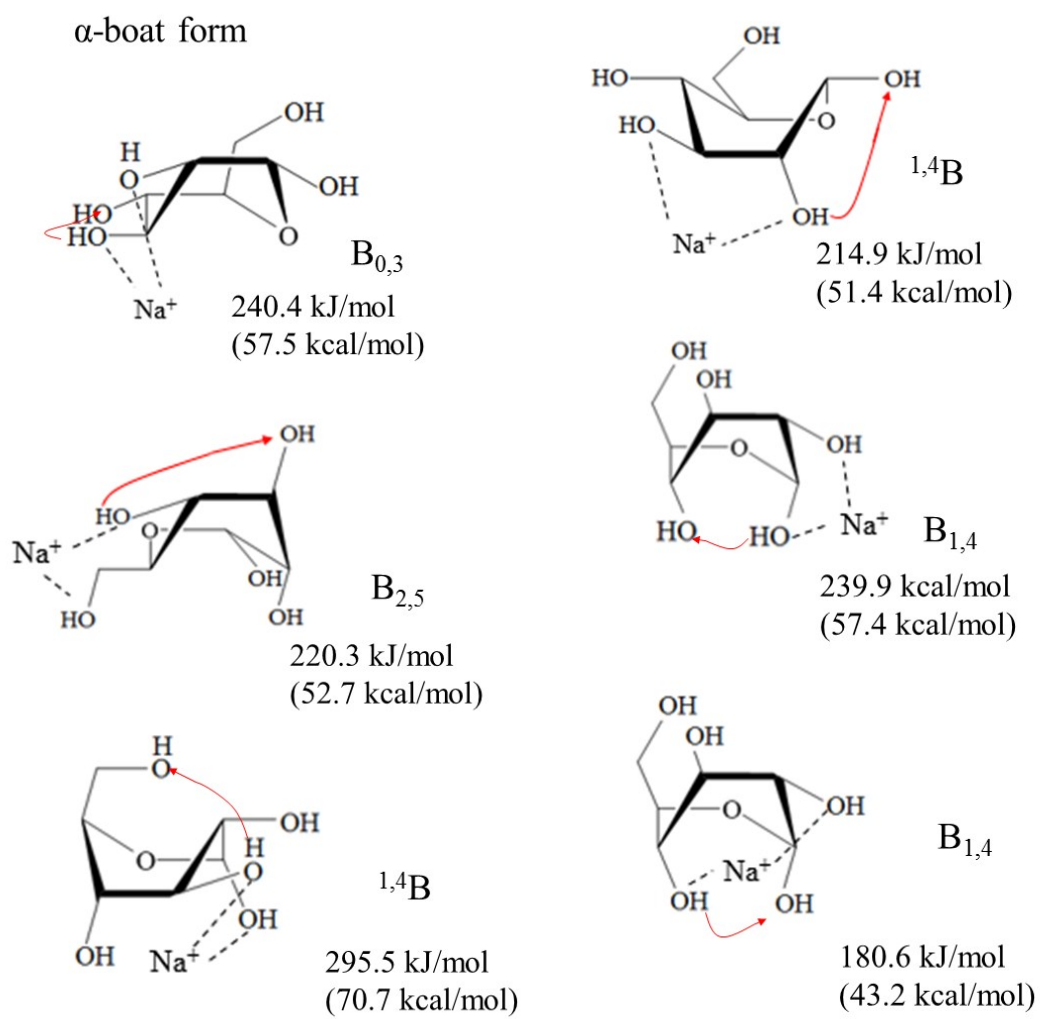

Figure S7-1. Energies of transition states of dehydration reaction for  $\alpha$ -sodiated glucose of various boat conformations.

$\beta$ -boat form

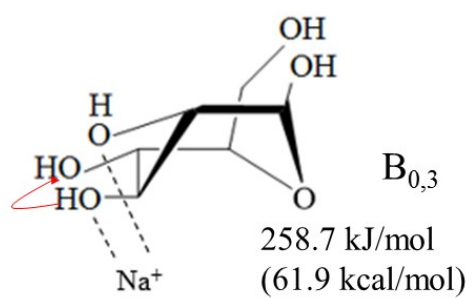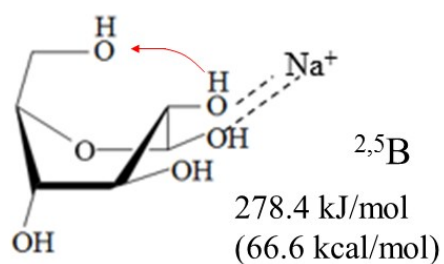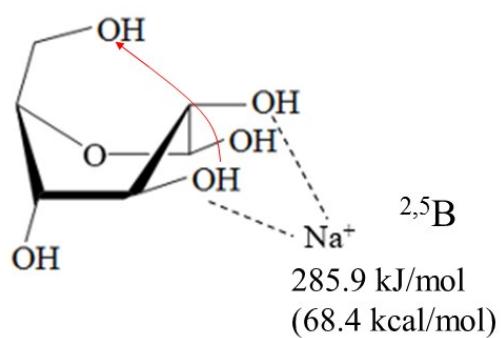

Figure S7-2. Energies of transition states of dehydration reaction for  $\beta$ -sodiated glucose of various boat conformations.

### Dehydration reaction of linear conformers

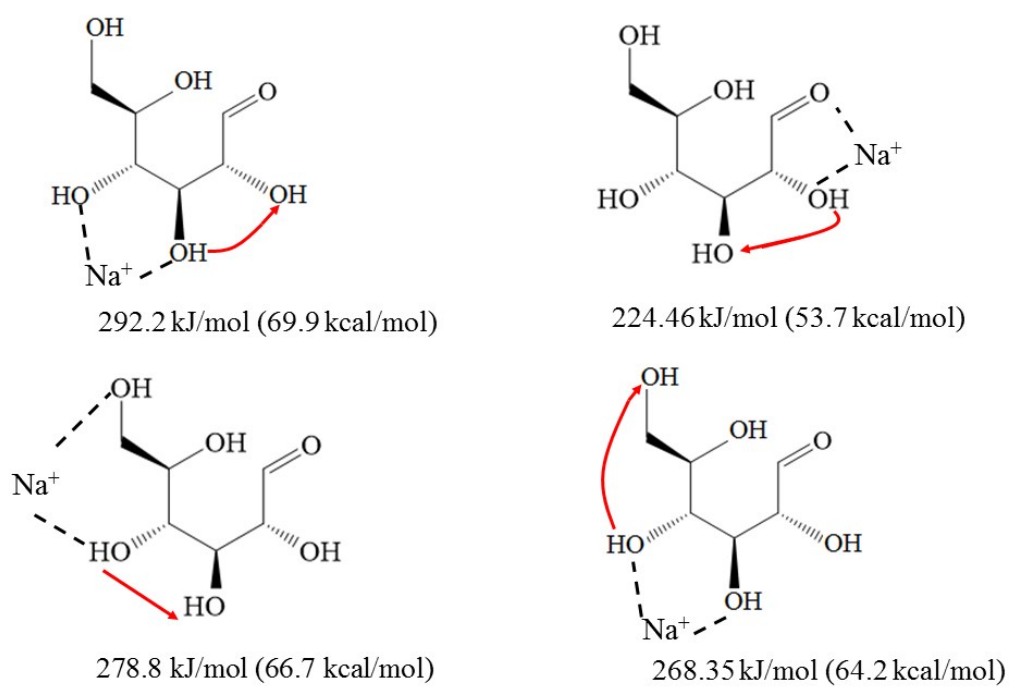

Figure S8. Transition state geometries and energies of linear conformer dehydration.



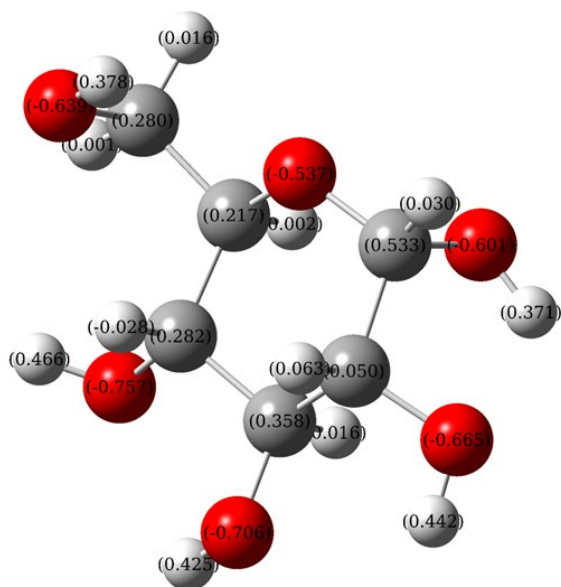

Figure S9-1. Charge distribution of glucose.

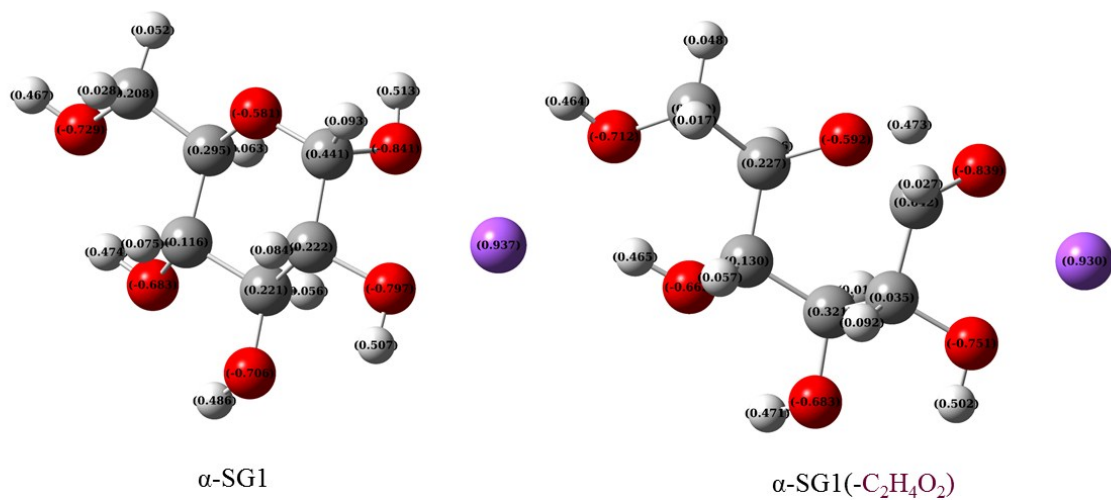

Figure S9-2. Charge distribution of sodiated glucose  $\alpha$ -SG1 and the corresponding transition state for cross-ring dissociation.

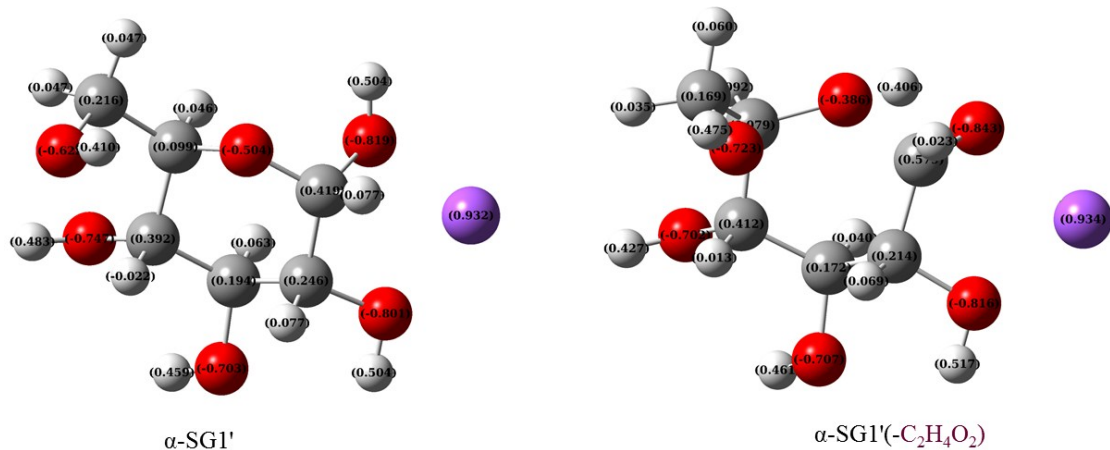

Figure S9-3. Charge distribution of sodiated glucose  $\alpha$ -SG1' and the corresponding transition state for cross-ring dissociation.

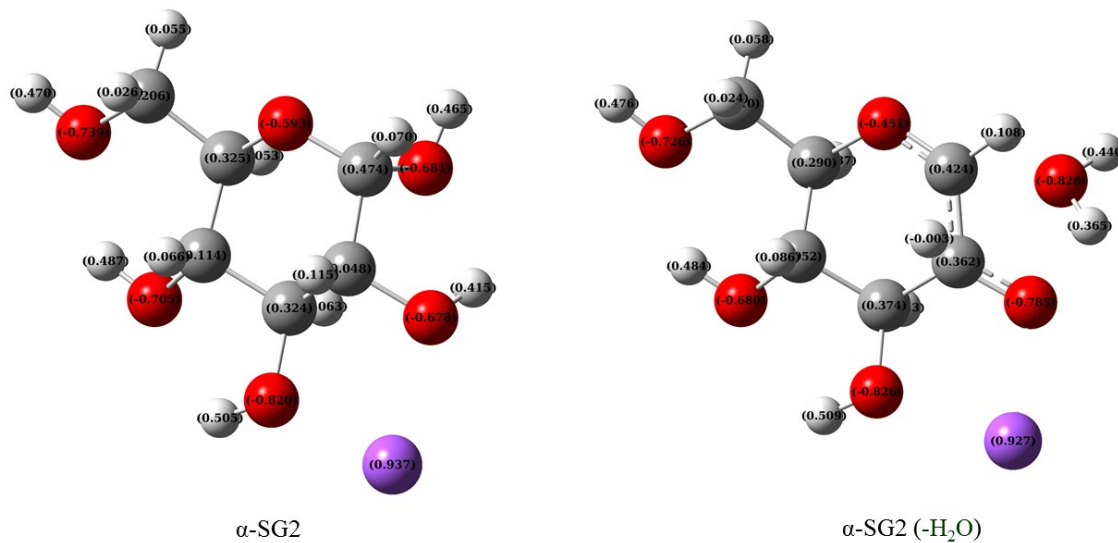

Figure S9-4. Charge distribution of sodiated glucose  $\alpha$ -SG2 and the corresponding transition state for dehydration.

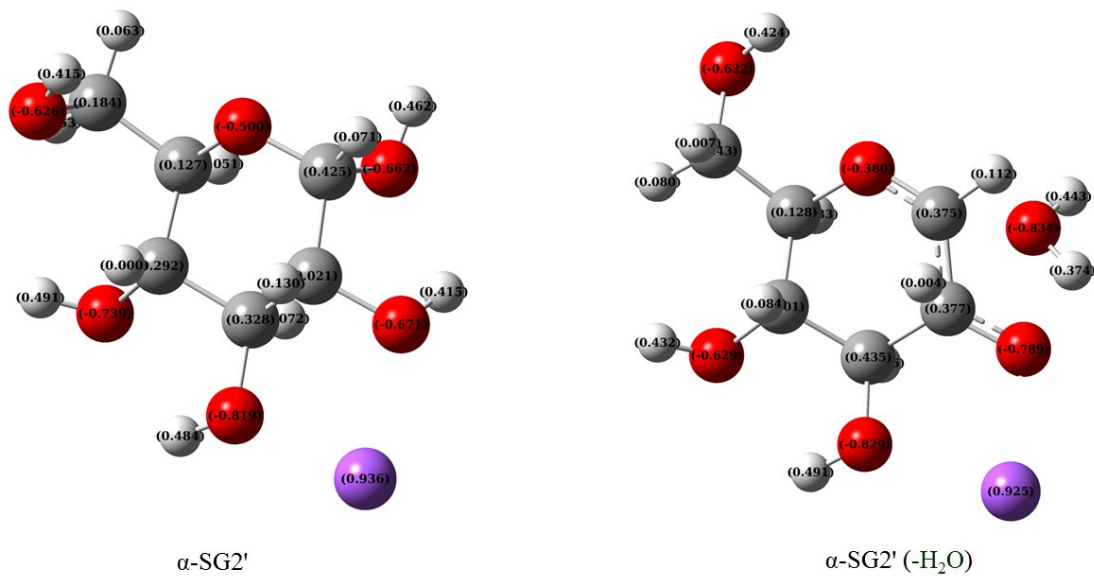

Figure S9-5. Charge distribution of sodiated glucose  $\alpha$ -SG2' and the corresponding transition state for dehydration.

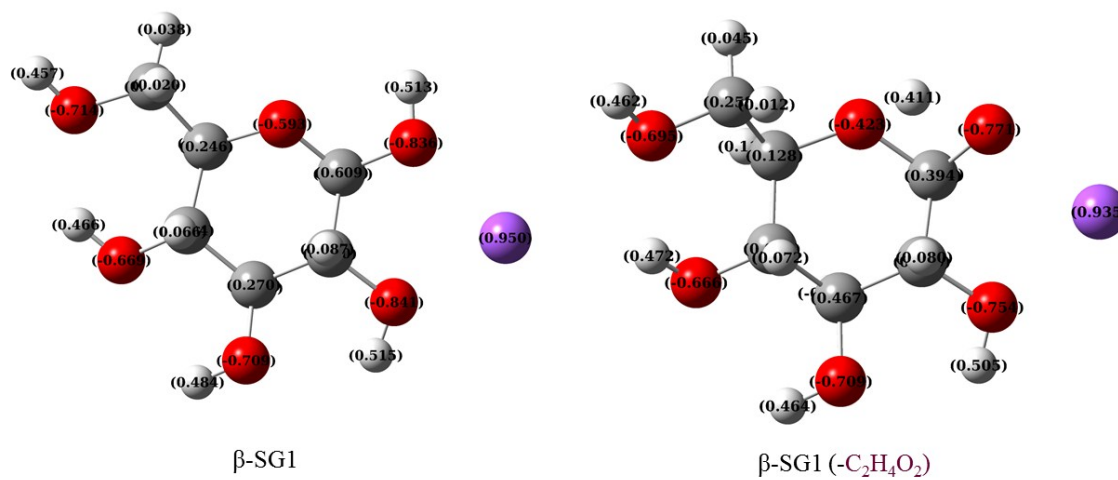

Figure S9-6. Charge distribution of sodiated glucose  $\beta$ -SG1 and the corresponding transition state for cross-ring dissociation.

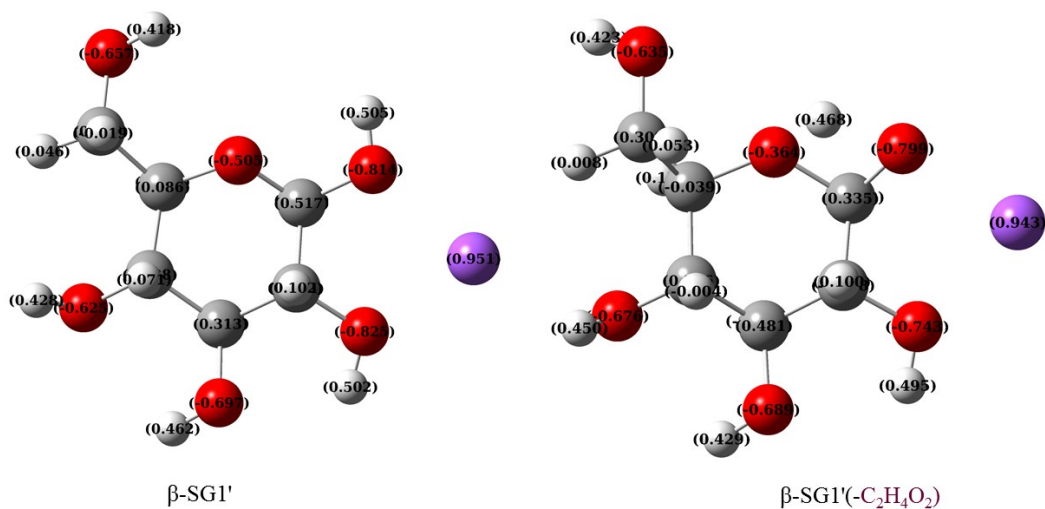

Figure S9-7. Charge distribution of sodiated glucose  $\beta$ -SG1' and the corresponding transition state for cross-ring dissociation.

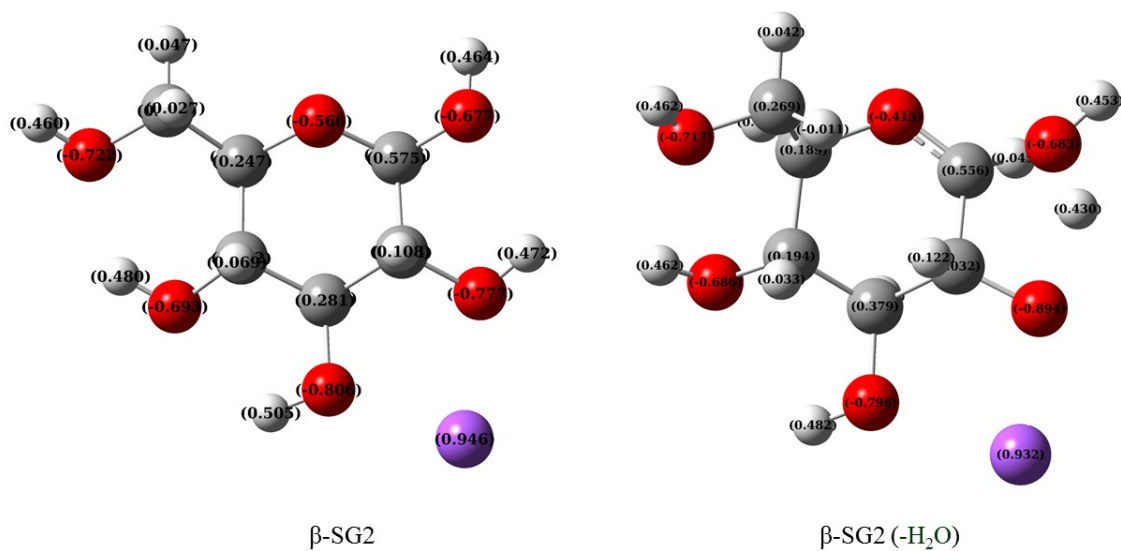

Figure S9-8. Charge distribution of sodiated glucose  $\beta$ -SG2 and the corresponding transition state for dehydration.

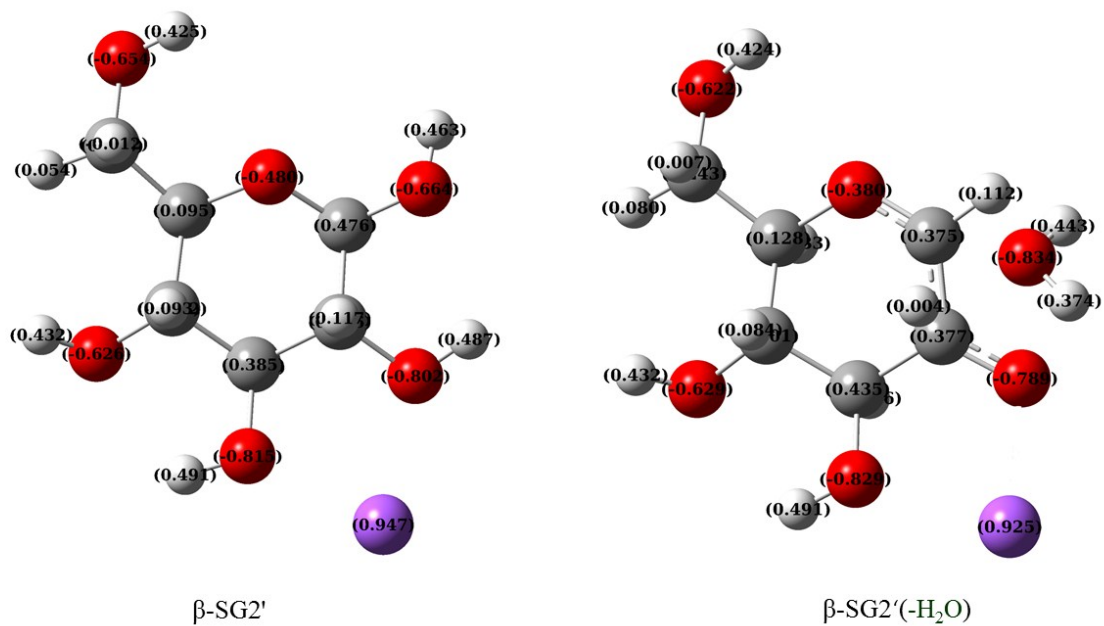

Figure S9-9. Charge distribution of sodiated glucose  $\beta$ -SG2' and the corresponding transition state for dehydration.

**Table SI.** Energies (kJ/mol) of transition states for the first bond cleavage in cross ring dissociation. The number 40.7 in the upper-left corner represents the energy of transition state for the cleavage of #0 bond (C1-O0 bond) starting from geometry  $\alpha$ -SG1. The number 79.3 and 86.1 in the upper-left corner represents the energies of transition states for the cleavage of #1 bond (C1-C2 bond), starting from geometry  $\alpha$ -SG2 by transferring the H atom from O2 and O1 to C1 and C2, respectively. The structures with the lowest barriers for each bond cleavage are shown in Figure S10.

|               | #0    | #1    | #2    | #3    | #4    | #5    | #6    | #7    |
|---------------|-------|-------|-------|-------|-------|-------|-------|-------|
| $\alpha$ -SG1 | 170.4 | X     | X     | 377.6 | 434.9 | 409.7 | 416.1 | 417.3 |
| $\alpha$ -SG2 | 185.0 | 328.8 | 357.4 | X     | X     | 358.8 | 410.6 | 387.6 |
| $\alpha$ -SG3 | 187.1 | 336.2 | 379.7 | 395.3 | 358.2 | X     | X     | 356.5 |
| $\alpha$ -SG4 | 208.5 | 357.2 | 402.9 | 398.3 | 398.8 | 416.1 | 353.6 | X     |
| $\alpha$ -SG5 | 215.6 | 339.9 | 402.1 | 364.7 | 382.0 | 381.8 | 379.4 | 392.8 |
| $\beta$ -SG 1 | 190.0 | X     | X     | 382.7 | 430.5 | 409.9 | 409.4 | 414.5 |
| $\beta$ -SG 2 | 208.0 | 341.2 | 359.6 | X     | X     | 366.8 | 416.6 | 390.4 |
| $\beta$ -SG 3 | 191.7 | 348.6 | 393.3 | 413.1 | 365.6 | X     | X     | 359.4 |
| $\beta$ -SG 4 | 202.2 | 370.1 | 418.4 | 425.3 | 408.5 | 432.6 | 364.6 | X     |
| $\beta$ -SG 5 | 213.9 | 346.7 | 408.4 | 388.5 | 385.0 | 393.8 | 385.2 | 403.7 |
| $\beta$ -SG 6 | X     | 366.6 | 476.7 | 442.6 | 453.1 | 439.9 | 424.3 | 441.9 |
| $\alpha$ -BG1 | 198.8 | 367.0 | 406.8 | 418.9 | 365.4 | X     | 392.6 | 393.0 |
| $\alpha$ -BG2 | 174.2 | X     | X     | 413.1 | 431.4 | 413.1 | 423.1 | 395.2 |
| $\alpha$ -BG3 | 215.1 | 355.1 | 387.7 | X     | X     | X     | X     | 370.7 |
| $\alpha$ -BG4 | 202.5 | 359.2 | 406.5 | 395.5 | 366.6 | 371.9 | 404.0 | 376.2 |
| $\beta$ -BG 1 | 190.5 | 336.7 | 396.0 | 404.4 | 358.7 | 364.5 | 397.7 | 373.6 |
| $\beta$ -BG 2 | 201.8 | X     | X     | 368.9 | 428.1 | 420.8 | 420.2 | 418.0 |
| $\beta$ -BG 3 | 267.5 | 395.7 | 394.1 | X     | X     | X     | X     | 370.2 |
| $\beta$ -BG 4 | 189.6 | 344.6 | 396.0 | 402.0 | 365.7 | 364.5 | 397.7 | 373.6 |

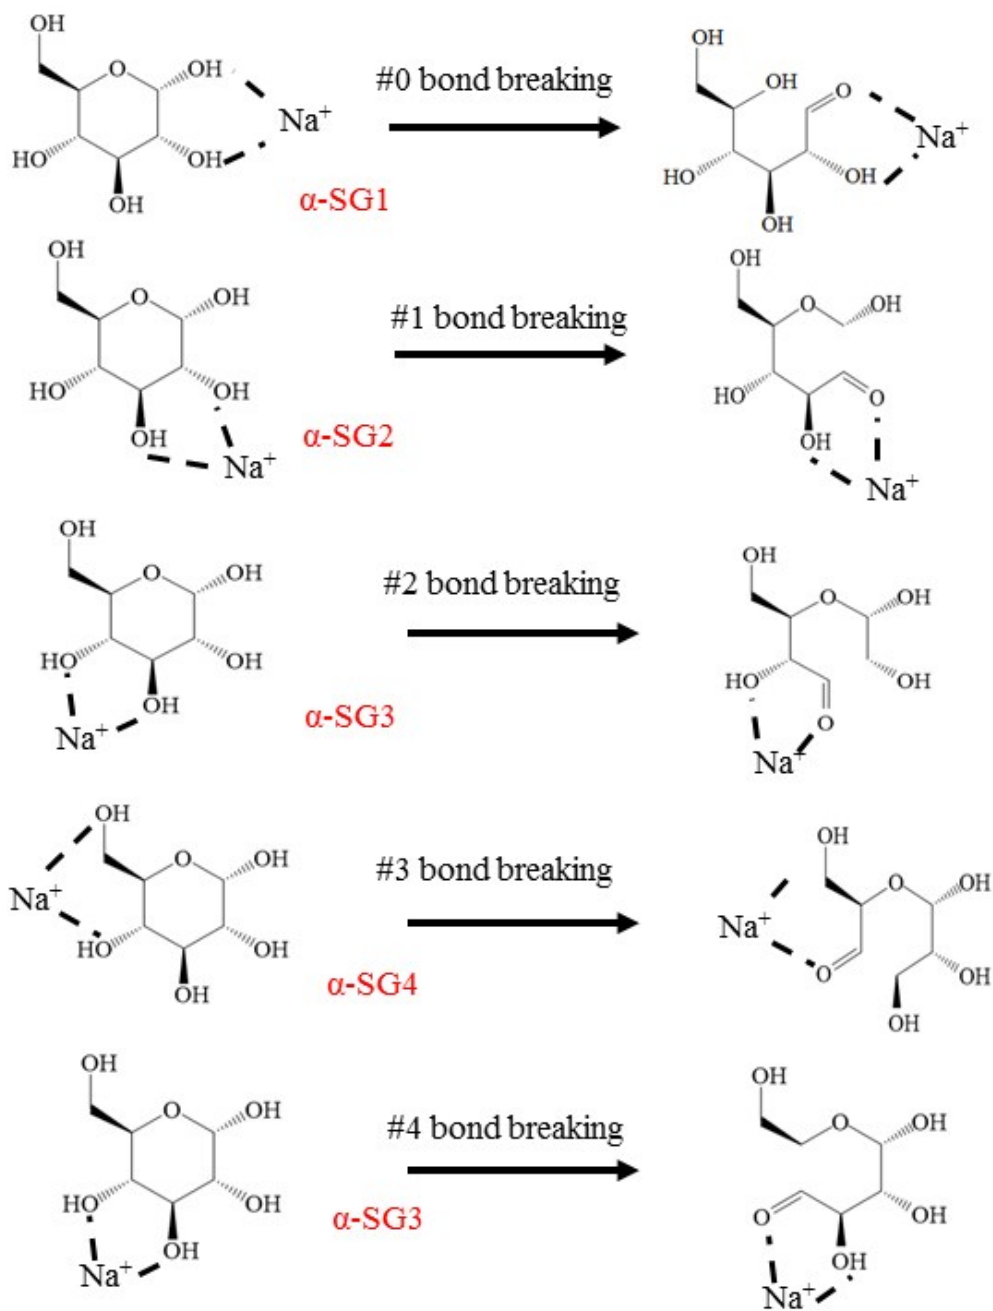

Figure S10. The scheme of structures with the lowest barriers in Table S1 for each bond cleavage.

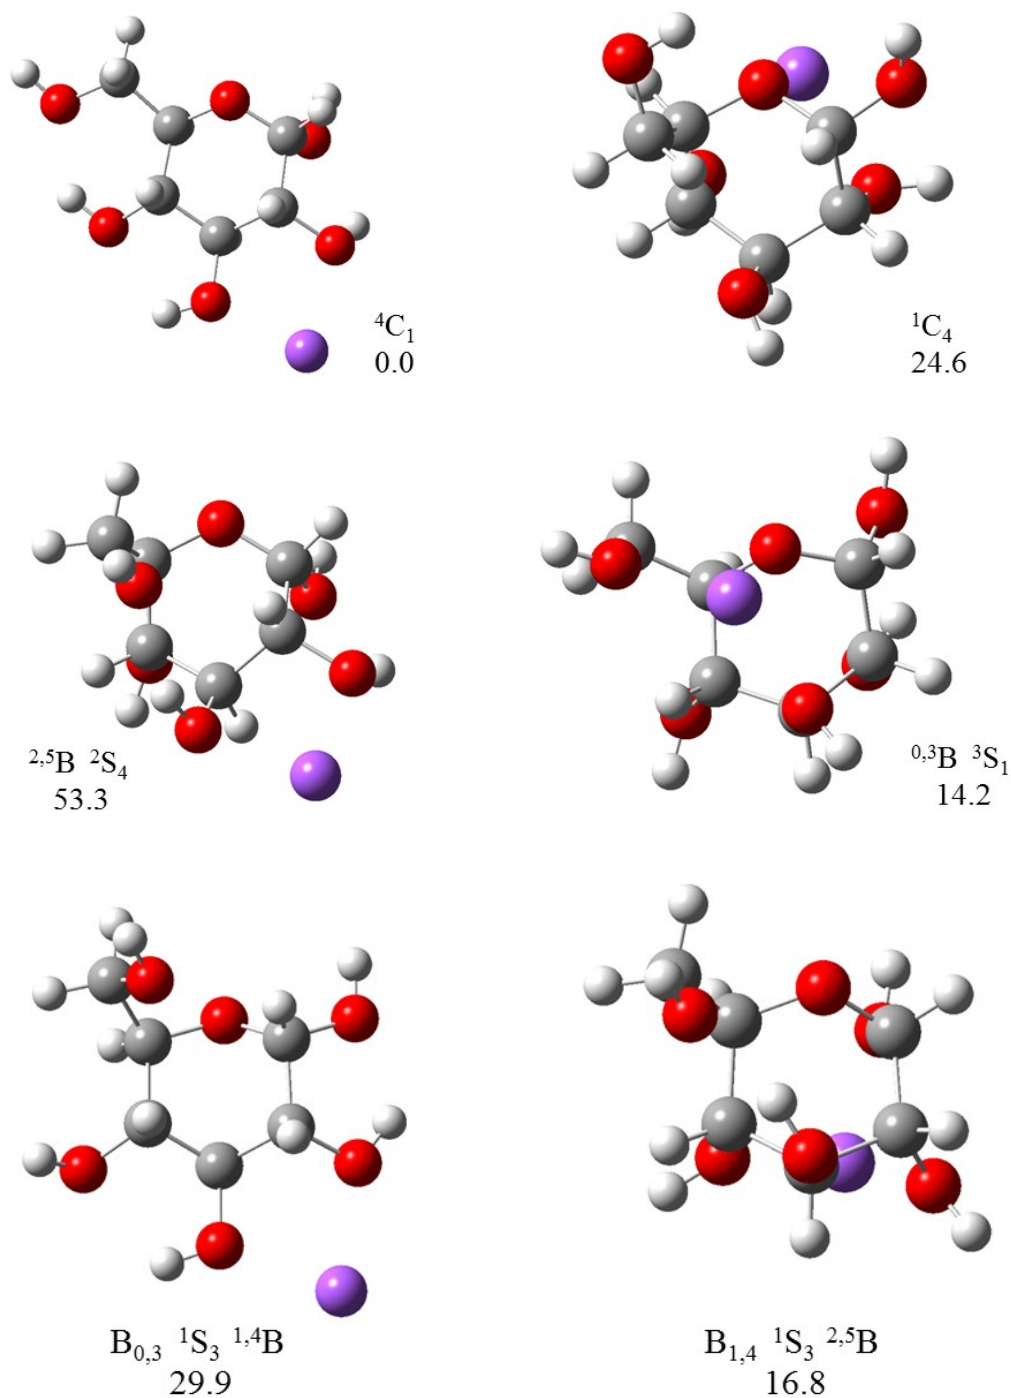

Figure S11-1. Geometries and energies (B3LYP/6-311+G(d,p), kJ/mol) of sodiated  $\alpha$ -glucoses used in the search for dissociation of low barriers. The geometries of sodiated glucose starting from the types of  ${}^4C_1$  and  ${}^{0,3}B$  are shown in Figure 3 and 4. The other types are shown here.



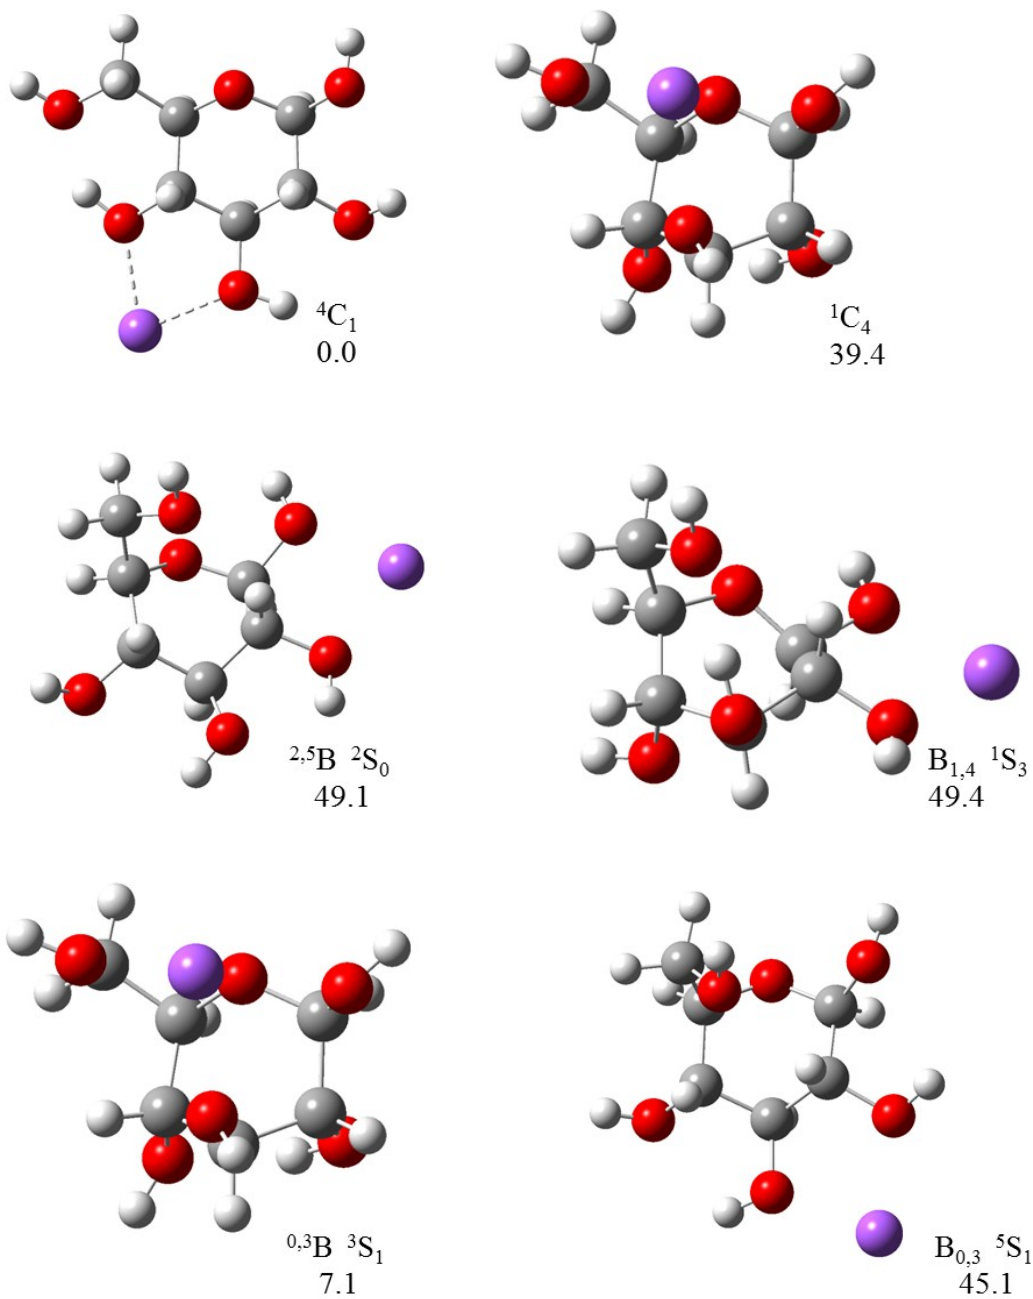

Figure S11-2. Geometries and energies (B3LYP/6-311+G(d,p), kJ/mol) of sodiated  $\beta$ -glucoses used in the search for dissociation of low barriers. The geometries of  $\beta$ -sodiated glucose starting from the types of  ${}^4C_1$  and  ${}^{0,3}B$  are shown in Figure S2 and S3. The other types are shown here.

**Table S2.** The XYZ coordinates of each atom for the sodiated glucose shown in Figure 7.

**$\alpha$ -SG1**

|    |             |             |             |
|----|-------------|-------------|-------------|
| C  | 0.87978800  | -1.15299900 | -0.69401700 |
| C  | -1.37056100 | -0.66880200 | 0.10615500  |
| C  | 1.16215200  | 0.34188500  | -0.86203100 |
| C  | 0.29878700  | 1.19032000  | 0.05579500  |
| C  | -1.17498200 | 0.84075100  | -0.12042800 |
| O  | -0.47578200 | -1.43688800 | -0.74040800 |
| O  | 2.56229200  | 0.59598100  | -0.61690600 |
| O  | 0.59453800  | 2.53748000  | -0.26943000 |
| O  | -1.86380400 | 1.62749500  | 0.83087700  |
| H  | -1.17371400 | -0.89713700 | 1.15933700  |
| H  | 0.93787600  | 0.59839400  | -1.90151800 |
| H  | 2.71428500  | 1.52731300  | -0.83049300 |
| H  | 0.56140100  | 0.99039000  | 1.10508600  |
| H  | -0.01983200 | 3.11129000  | 0.20662100  |
| H  | -1.48717800 | 1.09565900  | -1.14419300 |
| H  | -2.79135700 | 1.34622000  | 0.84559500  |
| C  | -2.76408100 | -1.16159300 | -0.27840100 |
| H  | -2.85162400 | -2.22710600 | -0.04375800 |
| H  | -2.90567300 | -1.02609400 | -1.35680900 |
| O  | -3.70195000 | -0.38633600 | 0.46841200  |
| H  | -4.59919200 | -0.67340800 | 0.27110100  |
| Na | 3.47013100  | -0.61613400 | 1.03564800  |
| H  | 1.32662900  | -1.72836100 | -1.50769100 |
| O  | 1.48104600  | -1.58715400 | 0.55632300  |
| H  | 1.15960700  | -2.48167700 | 0.73121800  |

**$\alpha$ -SG1 (-C<sub>2</sub>H<sub>4</sub>O<sub>2</sub>)**

|   |             |             |             |
|---|-------------|-------------|-------------|
| C | -1.06539400 | -1.05603900 | 0.66353700  |
| C | 1.45206400  | -0.71129400 | -0.33560400 |
| C | -1.11665300 | 0.47333700  | 0.79817600  |
| C | -0.18148500 | 1.19717800  | -0.15943900 |
| C | 1.26203800  | 0.75818400  | 0.07709700  |
| O | 0.29728100  | -1.54431900 | 0.05545400  |
| O | -2.48355400 | 0.85680200  | 0.55512900  |

|    |             |             |             |
|----|-------------|-------------|-------------|
| O  | -0.36904700 | 2.57360400  | 0.10212100  |
| O  | 2.06360000  | 1.60403200  | -0.72120700 |
| H  | 1.50276400  | -0.75439900 | -1.42539400 |
| H  | -0.85065000 | 0.75784500  | 1.82136700  |
| H  | -2.52445300 | 1.81725300  | 0.66798500  |
| H  | -0.45525000 | 0.96691100  | -1.19997000 |
| H  | 0.33162500  | 3.06946400  | -0.34309700 |
| H  | 1.50981600  | 0.88527900  | 1.14103400  |
| H  | 2.99188800  | 1.36512000  | -0.58318800 |
| C  | 2.68665500  | -1.35694200 | 0.28854000  |
| H  | 2.83178200  | -2.35992900 | -0.12473900 |
| H  | 2.54295200  | -1.43972900 | 1.37303000  |
| O  | 3.77755200  | -0.49502700 | -0.02504700 |
| H  | 4.60797100  | -0.88346300 | 0.26878600  |
| Na | -3.72708800 | -0.63121800 | -0.68705900 |
| H  | -1.12192900 | -1.57566500 | 1.62400600  |
| O  | -1.79324400 | -1.60019600 | -0.33782400 |
| H  | -0.53259400 | -1.89100600 | -0.68500500 |

### **$\alpha$ -SG1'**

|   |             |             |             |
|---|-------------|-------------|-------------|
| C | 0.57592000  | -1.16862400 | -0.56213700 |
| C | -1.46367400 | -0.26968800 | 0.43300500  |
| C | 1.07534400  | 0.24658100  | -0.86735300 |
| C | 0.43988100  | 1.29399600  | 0.03486300  |
| C | -1.08055200 | 1.15781500  | 0.01464400  |
| O | -0.80688300 | -1.21926900 | -0.45184300 |
| O | 2.51277700  | 0.27987200  | -0.75076500 |
| O | 0.90132500  | 2.54216400  | -0.44858800 |
| O | -1.56271000 | 2.11939500  | 0.94347900  |
| H | -1.10656600 | -0.43644100 | 1.45326000  |
| H | 0.80402700  | 0.46674500  | -1.90428600 |
| H | 2.79588300  | 1.15433500  | -1.05288900 |
| H | 0.77209300  | 1.14284200  | 1.07252200  |
| H | 0.47821100  | 3.24677900  | 0.05836500  |
| H | -1.45574100 | 1.36303100  | -0.99588700 |
| H | -2.46105900 | 2.38568900  | 0.72102000  |
| C | -2.99441900 | -0.55179000 | 0.35843500  |

|    |             |             |             |
|----|-------------|-------------|-------------|
| H  | -3.51107300 | 0.38021300  | 0.09286000  |
| H  | -3.35242500 | -0.84648400 | 1.34779000  |
| O  | -3.36845700 | -1.55564400 | -0.56155700 |
| H  | -2.60100200 | -1.81873300 | -1.08056100 |
| Na | 3.40794100  | -1.02554200 | 0.84029500  |
| H  | 0.82910600  | -1.85347400 | -1.37456300 |
| O  | 1.22692800  | -1.63005700 | 0.64819100  |
| H  | 0.78234900  | -2.44497600 | 0.91904600  |

**$\alpha$ -SG1' (-C<sub>2</sub>H<sub>4</sub>O<sub>2</sub>)**

|    |             |             |             |
|----|-------------|-------------|-------------|
| C  | -0.79152700 | -1.17789300 | 0.20279700  |
| C  | 1.65680600  | -0.50479500 | -0.71758400 |
| C  | -0.79068200 | 0.22792200  | 0.82285800  |
| C  | -0.10009200 | 1.23988500  | -0.08520900 |
| C  | 1.39311900  | 0.93176300  | -0.19694400 |
| O  | 0.43612500  | -1.33955700 | -0.71481100 |
| O  | -2.17307600 | 0.58499300  | 1.01042700  |
| O  | -0.32644100 | 2.50678500  | 0.50697800  |
| O  | 1.94298400  | 1.89039600  | -1.09810300 |
| H  | 1.94105700  | -0.44829100 | -1.76841600 |
| H  | -0.29035100 | 0.20867000  | 1.79556800  |
| H  | -2.17846600 | 1.48171600  | 1.37424700  |
| H  | -0.54780300 | 1.20581300  | -1.08841600 |
| H  | 0.09533700  | 3.18455400  | -0.03566200 |
| H  | 1.83389600  | 1.04459800  | 0.79695600  |
| H  | 2.80356300  | 2.18938300  | -0.78786200 |
| C  | 2.70875100  | -1.25353500 | 0.07831000  |
| H  | 3.66315900  | -0.71746300 | -0.01146100 |
| H  | 2.83343200  | -2.25891400 | -0.33605000 |
| O  | 2.25466100  | -1.29533400 | 1.42675800  |
| H  | 2.86414600  | -1.81082700 | 1.96465700  |
| Na | -3.63473500 | -0.48976100 | -0.41702700 |
| H  | -0.72752100 | -1.98253700 | 0.93876800  |
| O  | -1.67258200 | -1.36227000 | -0.81138200 |
| H  | -0.45997200 | -1.36951700 | -1.43934100 |

**$\alpha$ -SG2**

|    |             |             |             |
|----|-------------|-------------|-------------|
| C  | -0.29485600 | 1.82458900  | -0.28496900 |
| C  | 1.62533600  | 0.39271700  | 0.11743500  |
| C  | -1.20347900 | 0.60270100  | -0.50466600 |
| C  | -0.64190000 | -0.60277100 | 0.23037700  |
| C  | 0.79637000  | -0.86905400 | -0.18512600 |
| O  | 1.04486200  | 1.52332800  | -0.56344200 |
| O  | -2.55364800 | 0.87113500  | -0.07350100 |
| O  | -1.48725100 | -1.74152000 | -0.05411600 |
| O  | 1.18730700  | -2.01458000 | 0.54790100  |
| H  | 1.63593300  | 0.56460400  | 1.19903200  |
| H  | -1.25482700 | 0.39418900  | -1.57589700 |
| H  | -2.49387100 | 1.50932900  | 0.65502300  |
| H  | -0.65970400 | -0.42181500 | 1.31051200  |
| H  | -0.97319700 | -2.53231200 | 0.16862500  |
| H  | 0.83814300  | -1.06633400 | -1.26732100 |
| H  | 2.15083100  | -2.10840600 | 0.47652800  |
| C  | 3.05521700  | 0.31113300  | -0.41080100 |
| H  | 3.60780400  | 1.20246100  | -0.09975700 |
| H  | 3.03294500  | 0.27435400  | -1.50591700 |
| O  | 3.63566300  | -0.87733200 | 0.13329600  |
| H  | 4.56234000  | -0.93967600 | -0.11868600 |
| Na | -3.64957400 | -1.12925700 | -0.14504100 |
| O  | -0.52970100 | 2.22241700  | 1.05333500  |
| H  | -0.14723200 | 3.09401400  | 1.21147800  |
| H  | -0.55183700 | 2.62793600  | -0.97945900 |

**$\alpha$ -SG2 (-H<sub>2</sub>O)**

|   |             |             |             |
|---|-------------|-------------|-------------|
| C | -0.33552500 | 1.51501100  | -0.82205900 |
| C | 1.64531900  | 0.48792600  | 0.08241600  |
| C | -1.21253100 | 0.42099600  | -0.47701800 |
| C | -0.52677400 | -0.71356900 | 0.28011500  |
| C | 0.94289900  | -0.86828100 | -0.08905600 |
| O | 0.96267600  | 1.52112400  | -0.71970100 |
| O | -2.49783800 | 0.54787800  | -0.37742800 |
| O | -1.26583900 | -1.92052600 | 0.03736700  |
| O | 1.44848700  | -1.85670500 | 0.78297500  |
| H | 1.59593700  | 0.80983900  | 1.12533200  |
| H | -0.84604900 | 0.32801700  | -1.68284800 |

|    |             |             |             |
|----|-------------|-------------|-------------|
| H  | -2.30514000 | 2.21342000  | 1.02532500  |
| H  | -0.58741600 | -0.46406200 | 1.34601400  |
| H  | -0.74730700 | -2.65162100 | 0.40234900  |
| H  | 1.03018000  | -1.19135700 | -1.13805300 |
| H  | 2.41556600  | -1.87977000 | 0.70624300  |
| C  | 3.08398900  | 0.51592800  | -0.43041500 |
| H  | 3.52629300  | 1.49264100  | -0.21307400 |
| H  | 3.08331200  | 0.36279900  | -1.51632200 |
| O  | 3.77423200  | -0.53512300 | 0.23987300  |
| H  | 4.71643100  | -0.49474000 | 0.04626100  |
| Na | -3.51472400 | -1.37595900 | -0.21416500 |
| O  | -1.46799900 | 2.57905300  | 1.34684100  |
| H  | -1.68033900 | 3.38794600  | 1.82286900  |
| H  | -0.75351500 | 2.38876300  | -1.31159900 |

### **$\alpha$ -SG2'**

|   |             |             |             |
|---|-------------|-------------|-------------|
| C | -0.11622000 | -1.65804300 | -0.31225700 |
| C | -1.62007200 | 0.19515900  | 0.13830500  |
| C | 1.06732900  | -0.69566100 | -0.50710900 |
| C | 0.81733400  | 0.61108700  | 0.23192000  |
| C | -0.51725300 | 1.22016800  | -0.17769400 |
| O | -1.33167000 | -1.02091100 | -0.59246700 |
| O | 2.30430500  | -1.28862000 | -0.06463900 |
| O | 1.92030200  | 1.49997900  | -0.05522300 |
| O | -0.61084200 | 2.42760400  | 0.57180500  |
| H | -1.63238100 | -0.01624200 | 1.21229300  |
| H | 1.18099200  | -0.49624800 | -1.57542200 |
| H | 2.08009900  | -1.90624400 | 0.64966100  |
| H | 0.79194400  | 0.42839000  | 1.31194000  |
| H | 1.63272900  | 2.39073700  | 0.19435000  |
| H | -0.51346800 | 1.43319800  | -1.25529100 |
| H | -1.28798900 | 3.00671500  | 0.20615200  |
| C | -3.01501200 | 0.62484000  | -0.30104400 |
| H | -3.01973200 | 0.79570100  | -1.38644200 |
| H | -3.27482200 | 1.56145700  | 0.19791500  |
| O | -4.00113500 | -0.30859800 | 0.08318600  |
| H | -3.88235100 | -1.11290200 | -0.43357000 |

|    |             |             |             |
|----|-------------|-------------|-------------|
| Na | 3.87441900  | 0.36084000  | -0.12727000 |
| O  | 0.00262800  | -2.12085800 | 1.01920000  |
| H  | -0.59966200 | -2.85940500 | 1.17117200  |
| H  | -0.05930100 | -2.48845700 | -1.02039800 |

**$\alpha$ -SG2' (-H<sub>2</sub>O)**

|    |             |             |             |
|----|-------------|-------------|-------------|
| C  | 0.04612700  | 1.34833600  | -0.87246100 |
| C  | 1.65862300  | -0.13859500 | 0.12091100  |
| C  | -1.09611100 | 0.55215600  | -0.48715700 |
| C  | -0.74700200 | -0.71910700 | 0.28970900  |
| C  | 0.63126900  | -1.26564200 | -0.06576200 |
| O  | 1.29320900  | 0.99319400  | -0.76810200 |
| O  | -2.29360200 | 1.02860800  | -0.38382000 |
| O  | -1.78930800 | -1.67659400 | 0.05055900  |
| O  | 0.85395300  | -2.34827700 | 0.82650400  |
| H  | 1.62413400  | 0.25465500  | 1.13957600  |
| H  | -0.78259700 | 0.32916200  | -1.69416300 |
| H  | -1.56071300 | 2.62922500  | 1.08807000  |
| H  | -0.74237000 | -0.44870600 | 1.35224200  |
| H  | -1.51377800 | -2.50811400 | 0.46093900  |
| H  | 0.63821700  | -1.61371300 | -1.10733000 |
| H  | 1.51405300  | -2.95647600 | 0.47643600  |
| C  | 3.09201600  | -0.49703900 | -0.24470300 |
| H  | 3.14423700  | -0.78188000 | -1.30417800 |
| H  | 3.39113500  | -1.35802800 | 0.35749300  |
| O  | 3.99494400  | 0.53699800  | 0.07128800  |
| H  | 3.91691500  | 1.24634600  | -0.57560000 |
| Na | -3.81434900 | -0.51887300 | -0.20262200 |
| O  | -0.62892200 | 2.65228800  | 1.34556200  |
| H  | -0.50039800 | 3.46051600  | 1.85237100  |
| H  | -0.12270900 | 2.28422300  | -1.39616200 |

**$\beta$ -SG1**

|   |             |             |             |
|---|-------------|-------------|-------------|
| C | 0.94445700  | -0.89691000 | 0.37439600  |
| C | -1.42770100 | -0.72613200 | 0.30057600  |
| C | 1.12982500  | 0.47767500  | -0.25123700 |
| C | -0.01571500 | 1.36368000  | 0.20209000  |

|    |             |             |             |
|----|-------------|-------------|-------------|
| C  | -1.35400900 | 0.73725400  | -0.19818000 |
| O  | 2.02311100  | -1.73140700 | -0.03827600 |
| O  | -0.24557400 | -1.46056300 | -0.09650000 |
| O  | 2.40754400  | 1.01857600  | 0.14007800  |
| O  | 0.21487800  | 2.63309200  | -0.38369800 |
| O  | -2.34112200 | 1.55710300  | 0.39197600  |
| H  | 0.93471800  | -0.83414900 | 1.47312000  |
| H  | 1.73703700  | -2.65215800 | 0.03451800  |
| H  | -1.50627700 | -0.72008000 | 1.39549300  |
| H  | 1.10649600  | 0.36761500  | -1.34104400 |
| H  | 2.34218200  | 1.98282900  | 0.06694800  |
| H  | 0.00001100  | 1.45039100  | 1.29853900  |
| H  | -0.50748000 | 3.22530300  | -0.13790200 |
| H  | -1.43563200 | 0.74606300  | -1.29494800 |
| H  | -3.20632200 | 1.14903600  | 0.23750500  |
| C  | -2.59646100 | -1.50420900 | -0.29923000 |
| H  | -2.64398400 | -2.49843100 | 0.15596500  |
| H  | -2.43338200 | -1.61641100 | -1.37750000 |
| O  | -3.77944200 | -0.75264700 | -0.03117900 |
| H  | -4.55166700 | -1.21924800 | -0.36597100 |
| Na | 3.98606900  | -0.56383000 | -0.07040300 |

**$\beta$ -SG1 (-C<sub>2</sub>H<sub>4</sub>O<sub>2</sub>)**

|   |             |             |             |
|---|-------------|-------------|-------------|
| C | 1.17899600  | -0.76062600 | 0.63216800  |
| C | -1.46626200 | -0.70205800 | 0.43882600  |
| C | 1.13931000  | 0.54700800  | -0.14189200 |
| C | -0.02153400 | 1.41592200  | 0.30161700  |
| C | -1.32107300 | 0.72525700  | -0.14322200 |
| O | 1.86140500  | -1.75015500 | 0.01237200  |
| O | -0.17298800 | -1.42430700 | 0.49073400  |
| O | 2.43721900  | 1.13038100  | 0.03511100  |
| O | 0.15495800  | 2.66916400  | -0.32883800 |
| O | -2.37430900 | 1.54148200  | 0.32060200  |
| H | 1.37461500  | -0.62281100 | 1.70257900  |
| H | 0.50194600  | -2.09720300 | -0.15525500 |
| H | -1.78909500 | -0.62112200 | 1.47830600  |
| H | 1.00568800  | 0.30743900  | -1.20498800 |
| H | 2.36505700  | 2.08219800  | -0.12981500 |



|    |             |             |             |
|----|-------------|-------------|-------------|
| H  | -0.03232200 | 1.53525000  | 1.39448400  |
| H  | -0.59744200 | 3.23761200  | -0.11914800 |
| H  | -1.31952100 | 0.67822700  | -1.24121200 |
| H  | -3.21194600 | 1.17290500  | 0.00493500  |
| C  | -2.42923700 | -1.58447800 | -0.35159600 |
| H  | -2.57737100 | -2.53430300 | 0.17200400  |
| H  | -2.00940200 | -1.78635800 | -1.34604600 |
| O  | -3.63879000 | -0.84242900 | -0.44893000 |
| H  | -4.33434700 | -1.38306900 | -0.83736900 |
| Na | 3.81845200  | -0.76436300 | -0.43475300 |

### $\beta$ -SG1'

|    |             |             |             |
|----|-------------|-------------|-------------|
| C  | 0.71314000  | -0.88884000 | 0.31341100  |
| C  | -1.59498400 | -0.32554300 | 0.22460600  |
| C  | 1.13955600  | 0.46389100  | -0.23861800 |
| C  | 0.13327700  | 1.50641500  | 0.21797700  |
| C  | -1.27456200 | 1.11269100  | -0.24255000 |
| O  | 1.65877800  | -1.86572700 | -0.11240100 |
| O  | -0.53741800 | -1.22097800 | -0.21486300 |
| O  | 2.47160600  | 0.77523400  | 0.21398100  |
| O  | 0.58164400  | 2.73995400  | -0.31454500 |
| O  | -2.14661900 | 2.06710700  | 0.34789700  |
| H  | 0.67595000  | -0.87453400 | 1.41316800  |
| H  | 1.24020700  | -2.73559800 | -0.05969300 |
| H  | -1.64605000 | -0.34716800 | 1.32060700  |
| H  | 1.13759600  | 0.40519100  | -1.33286100 |
| H  | 2.57072700  | 1.73826400  | 0.16997600  |
| H  | 0.12630500  | 1.55244500  | 1.31702000  |
| H  | -0.01071000 | 3.44207700  | -0.01729300 |
| H  | -1.31635300 | 1.16540400  | -1.33759500 |
| H  | -2.93174700 | 2.19324000  | -0.19422400 |
| C  | -2.89587600 | -0.87955100 | -0.34032000 |
| H  | -2.82984200 | -0.92260400 | -1.43554300 |
| H  | -3.70904000 | -0.20250300 | -0.07086500 |
| O  | -3.22951000 | -2.13571200 | 0.21349900  |
| H  | -2.65021200 | -2.80698500 | -0.16084100 |
| Na | 3.78472800  | -1.03824100 | -0.02613000 |

**$\beta$ -SG1' (-C<sub>2</sub>H<sub>4</sub>O<sub>2</sub>)**

|    |             |             |             |
|----|-------------|-------------|-------------|
| C  | 0.93842600  | -0.78737700 | 0.60556700  |
| C  | -1.64472300 | -0.28343400 | 0.29836500  |
| C  | 1.16960500  | 0.51332000  | -0.14468600 |
| C  | 0.15612700  | 1.56054100  | 0.28058700  |
| C  | -1.23062400 | 1.11399000  | -0.22360200 |
| O  | 1.47282400  | -1.88226800 | 0.01235400  |
| O  | -0.48302000 | -1.19885300 | 0.38702700  |
| O  | 2.53887400  | 0.85725800  | 0.09835300  |
| O  | 0.56363300  | 2.77939300  | -0.31153800 |
| O  | -2.17827300 | 2.06316400  | 0.24744600  |
| H  | 1.10804300  | -0.68721600 | 1.68537800  |
| H  | 0.08843200  | -2.01264900 | -0.20396700 |
| H  | -1.99773400 | -0.17936600 | 1.32671100  |
| H  | 1.04094900  | 0.31693400  | -1.21744400 |
| H  | 2.64849700  | 1.80490100  | -0.06776100 |
| H  | 0.12780500  | 1.65683900  | 1.37498600  |
| H  | 0.00088500  | 3.49493600  | 0.00879900  |
| H  | -1.19720100 | 1.11274000  | -1.31955800 |
| H  | -2.77297200 | 2.33138700  | -0.45976700 |
| C  | -2.69623100 | -0.96447100 | -0.57280500 |
| H  | -2.29442700 | -1.09882800 | -1.58200200 |
| H  | -3.56079000 | -0.29419600 | -0.64318800 |
| O  | -3.04613200 | -2.24745800 | -0.10508200 |
| H  | -3.74077100 | -2.18831300 | 0.55913300  |
| Na | 3.58641500  | -1.28567900 | -0.32276000 |

 **$\beta$ -SG2**

|   |             |             |             |
|---|-------------|-------------|-------------|
| C | -0.32540100 | 1.71552400  | 0.32705600  |
| C | 1.64452300  | 0.36369800  | 0.29484100  |
| C | -1.18229100 | 0.58012400  | -0.24116000 |
| C | -0.60574400 | -0.73166900 | 0.24521800  |
| C | 0.84619100  | -0.86287800 | -0.20147300 |
| O | -0.87418500 | 2.89566600  | -0.15903800 |
| O | 1.00066900  | 1.56804000  | -0.14446300 |
| O | -2.55703000 | 0.67908200  | 0.18376400  |

|    |             |             |             |
|----|-------------|-------------|-------------|
| O  | -1.40355400 | -1.82761200 | -0.25161200 |
| O  | 1.28143600  | -2.09632700 | 0.33823900  |
| H  | -0.32967000 | 1.69308500  | 1.42907900  |
| H  | -0.41239300 | 3.65786000  | 0.21131300  |
| H  | 1.69353000  | 0.33281800  | 1.39220500  |
| H  | -1.13641300 | 0.64603300  | -1.33346500 |
| H  | -2.82003300 | 1.60696700  | 0.10238300  |
| H  | -0.63290000 | -0.76329000 | 1.34186900  |
| H  | -0.85416300 | -2.62338400 | -0.18388700 |
| H  | 0.88560300  | -0.88245200 | -1.30058500 |
| H  | 2.24236900  | -2.15703300 | 0.21526000  |
| C  | 3.05691000  | 0.42187800  | -0.28213100 |
| H  | 3.60268500  | 1.25038400  | 0.17829200  |
| H  | 2.99438900  | 0.59656400  | -1.36206000 |
| O  | 3.67928600  | -0.83384800 | 0.00282600  |
| H  | 4.59629900  | -0.82368300 | -0.28887100 |
| Na | -3.58612800 | -1.32126700 | -0.09212400 |

### **β-SG2 (-H<sub>2</sub>O)**

|   |             |             |             |
|---|-------------|-------------|-------------|
| C | -0.32154500 | 1.44312600  | 0.80023000  |
| C | 1.73696800  | 0.22070600  | 0.47147300  |
| C | -1.01883500 | 0.43790900  | -0.08432600 |
| C | -0.57128900 | -0.92052600 | 0.48524300  |
| C | 0.90241600  | -1.04931000 | 0.10328500  |
| O | -0.88616800 | 2.82705900  | -0.35997700 |
| O | 0.95249200  | 1.35947000  | 1.01759400  |
| O | -2.34262500 | 0.74967800  | -0.18098300 |
| O | -1.36920600 | -1.94693400 | -0.11902000 |
| O | 1.41347800  | -2.20510400 | 0.74020400  |
| H | -0.87401400 | 1.87968900  | 1.62790000  |
| H | -1.04660400 | 3.67500200  | 0.07763200  |
| H | 2.36780800  | -0.04006800 | 1.32089700  |
| H | -0.51423800 | 0.51104800  | -1.07181000 |
| H | -1.77115900 | 2.33053600  | -0.46675600 |
| H | -0.69296100 | -0.97392000 | 1.57473300  |
| H | -0.96724300 | -2.80070700 | 0.09144000  |
| H | 0.94321600  | -1.17674200 | -0.98381200 |
| H | 2.25496200  | -2.44427500 | 0.33116500  |

|    |             |             |             |
|----|-------------|-------------|-------------|
| C  | 2.61397600  | 0.71911100  | -0.67115700 |
| H  | 3.23691300  | 1.54786900  | -0.32076200 |
| H  | 1.99883500  | 1.06853200  | -1.51010100 |
| O  | 3.39009500  | -0.41818600 | -1.03042800 |
| H  | 4.07138900  | -0.17099300 | -1.66384200 |
| Na | -3.48378000 | -1.03999300 | -0.56129800 |

### **$\beta$ -SG2'**

|    |             |             |             |
|----|-------------|-------------|-------------|
| C  | 0.11949100  | 1.56592400  | 0.27764500  |
| C  | 1.63876600  | -0.27711000 | 0.23182700  |
| C  | -1.03415900 | 0.70306900  | -0.24053400 |
| C  | -0.82037000 | -0.71894100 | 0.23509900  |
| C  | 0.53106500  | -1.23702600 | -0.25289200 |
| O  | -0.10835400 | 2.84650700  | -0.21209400 |
| O  | 1.33054600  | 1.04942700  | -0.23785600 |
| O  | -2.31318400 | 1.17014900  | 0.23300400  |
| O  | -1.90557200 | -1.54599000 | -0.23403800 |
| O  | 0.62305900  | -2.55171900 | 0.28637800  |
| H  | 0.15273000  | 1.55573200  | 1.37894000  |
| H  | 0.53448600  | 3.46618000  | 0.15394500  |
| H  | 1.67288700  | -0.28395300 | 1.32984200  |
| H  | -1.01501700 | 0.75227300  | -1.33477300 |
| H  | -2.31369200 | 2.13540500  | 0.15844300  |
| H  | -0.82177300 | -0.74612300 | 1.33235100  |
| H  | -1.61009700 | -2.46507300 | -0.15097200 |
| H  | 0.53338900  | -1.26688300 | -1.35025700 |
| H  | 1.30334200  | -3.06147500 | -0.16634300 |
| C  | 3.02503900  | -0.61591400 | -0.30531700 |
| H  | 3.00961000  | -0.56816500 | -1.40270100 |
| H  | 3.28848900  | -1.63357800 | -0.00692500 |
| O  | 4.02105200  | 0.22080300  | 0.23974400  |
| H  | 3.90001300  | 1.11156600  | -0.10668000 |
| Na | -3.87034000 | -0.45721200 | -0.01008600 |

### **$\beta$ -SG2' (-H<sub>2</sub>O)**

|   |             |             |            |
|---|-------------|-------------|------------|
| C | -0.15384700 | -1.17536300 | 0.90708500 |
|---|-------------|-------------|------------|

|    |             |             |             |
|----|-------------|-------------|-------------|
| C  | -1.69351300 | 0.55467100  | 0.23132700  |
| C  | 0.84416700  | -0.56920100 | -0.05035300 |
| C  | 0.86787200  | 0.90914600  | 0.36984800  |
| C  | -0.47928300 | 1.49660200  | -0.06585000 |
| O  | -0.05108600 | -2.80234200 | -0.02877000 |
| O  | -1.33161400 | -0.65234000 | 1.03845900  |
| O  | 1.98876900  | -1.31124500 | -0.04954300 |
| O  | 1.97349100  | 1.54650800  | -0.28320500 |
| O  | -0.59735000 | 2.75199600  | 0.58584800  |
| H  | 0.21994500  | -1.63493900 | 1.81849200  |
| H  | -0.16158600 | -3.58666500 | 0.52727800  |
| H  | -2.36368800 | 1.06586200  | 0.92140900  |
| H  | 0.36023700  | -0.57852600 | -1.04962500 |
| H  | 0.95021500  | -2.62042300 | -0.15866100 |
| H  | 0.98371800  | 1.02477200  | 1.45484900  |
| H  | 1.92954500  | 2.49383400  | -0.09706700 |
| H  | -0.42358500 | 1.63821700  | -1.15279500 |
| H  | -1.23900600 | 3.31512000  | 0.13829900  |
| C  | -2.48846500 | 0.12258900  | -0.99992700 |
| H  | -1.88408100 | -0.52369900 | -1.64905700 |
| H  | -2.72931600 | 1.02575700  | -1.56869900 |
| O  | -3.71928600 | -0.47091700 | -0.66066100 |
| H  | -3.58206400 | -1.37733900 | -0.36669800 |
| Na | 3.67769800  | -0.06962800 | -0.54432100 |

### **β-SG1**

|   |             |             |             |
|---|-------------|-------------|-------------|
| C | -0.16423600 | 1.38184800  | 0.51530400  |
| C | 0.51042100  | 0.94618100  | -0.81347700 |
| C | -0.79736100 | -1.15614700 | -0.95631600 |
| C | -1.78696800 | -0.50117100 | 0.03672500  |
| C | -1.01653900 | 0.25310700  | 1.12976400  |
| H | -0.00375400 | 1.45869100  | -1.63333400 |
| H | -1.25191300 | -1.17911300 | -1.95033400 |
| H | -2.36762000 | -1.31428800 | 0.48043700  |
| H | -1.72317200 | 0.70198300  | 1.83295000  |
| H | 0.59105800  | 1.67315700  | 1.24979700  |
| O | 0.46264400  | -0.47560300 | -1.01098500 |
| O | -0.44381400 | -2.45890900 | -0.52356800 |

|    |             |             |             |
|----|-------------|-------------|-------------|
| H  | -0.55593100 | -3.08827300 | -1.24408600 |
| O  | -2.69459200 | 0.34092600  | -0.64631200 |
| H  | -2.42255300 | 1.26789100  | -0.57906700 |
| O  | -0.12458800 | -0.63414600 | 1.83936800  |
| H  | -0.61499700 | -1.08106400 | 2.53828200  |
| O  | -0.99558300 | 2.49352900  | 0.16959800  |
| H  | -1.15688800 | 3.05097800  | 0.93967100  |
| C  | 1.98772100  | 1.29611000  | -0.87400800 |
| H  | 2.38577900  | 1.05611000  | -1.86319000 |
| H  | 2.11438100  | 2.36507000  | -0.68162400 |
| O  | 2.66960200  | 0.51375100  | 0.13271000  |
| H  | 3.55799400  | 0.86310100  | 0.25868500  |
| Na | 1.64182100  | -1.57547200 | 0.61248800  |

### **$\beta$ -SG1 (-H<sub>2</sub>O)**

|   |             |             |             |
|---|-------------|-------------|-------------|
| C | 0.78838900  | -1.00473600 | 0.80764500  |
| C | 0.28022300  | -1.32903100 | -0.61166100 |
| C | 0.59856600  | 0.99967800  | -1.27181700 |
| C | 1.43318700  | 1.26638400  | -0.04398100 |
| C | 0.78931300  | 0.51034000  | 1.13858600  |
| H | 1.07286900  | -1.88197000 | -1.12028600 |
| H | 0.50947300  | 1.70354400  | -2.09417000 |
| H | 1.45450500  | 2.33698500  | 0.15854100  |
| H | 1.44832700  | 0.64000300  | 2.01453000  |
| H | 0.14860700  | -1.50595000 | 1.53827000  |
| O | 0.11509700  | -0.13891100 | -1.52144100 |
| O | -1.40974500 | 2.29289100  | -0.50323600 |
| H | -1.47367000 | 3.25260900  | -0.56399600 |
| O | 2.73279900  | 0.86435200  | -0.46445700 |
| H | 2.91175900  | -0.02868800 | -0.12048100 |
| O | -0.48490200 | 0.97353300  | 1.33479500  |
| H | -0.92570000 | 2.00269400  | 0.36798900  |
| O | 2.12010100  | -1.55280500 | 0.83578600  |
| H | 2.41199000  | -1.66056100 | 1.74910500  |
| C | -0.97826900 | -2.15504600 | -0.76510800 |
| H | -1.19183300 | -2.28218600 | -1.83034500 |
| H | -0.75862200 | -3.13644500 | -0.33176400 |
| O | -2.11206400 | -1.56750600 | -0.10527000 |

|    |             |             |             |
|----|-------------|-------------|-------------|
| H  | -2.83470900 | -2.20460300 | -0.15302700 |
| Na | -2.53925000 | 0.55150900  | 0.75038500  |

### **$\beta$ -SG4**

|    |             |             |             |
|----|-------------|-------------|-------------|
| C  | -0.16355600 | 1.38157500  | 0.51565900  |
| C  | 0.51090300  | 0.94587500  | -0.81320600 |
| C  | -0.79759000 | -1.15580300 | -0.95662100 |
| C  | -1.78722700 | -0.50031700 | 0.03595800  |
| C  | -1.01674500 | 0.25310600  | 1.12959100  |
| H  | -0.00340900 | 1.45819200  | -1.63307900 |
| H  | -1.25123900 | -1.17820300 | -1.95105500 |
| H  | -2.36875800 | -1.31315500 | 0.47904500  |
| H  | -1.72335700 | 0.70235200  | 1.83255300  |
| H  | 0.59177700  | 1.67215500  | 1.25039800  |
| O  | 0.46297300  | -0.47597100 | -1.01030100 |
| O  | -0.44514300 | -2.45885100 | -0.52383600 |
| H  | -0.55660000 | -3.08791200 | -1.24471900 |
| O  | -2.69389000 | 0.34285000  | -0.64705200 |
| H  | -2.42150500 | 1.26966500  | -0.57892800 |
| O  | -0.12566800 | -0.63473400 | 1.83945700  |
| H  | -0.61661500 | -1.08140000 | 2.53816000  |
| O  | -0.99421600 | 2.49391600  | 0.17023000  |
| H  | -1.15450100 | 3.05179200  | 0.94020300  |
| C  | 1.98823800  | 1.29566800  | -0.87391700 |
| H  | 2.38613100  | 1.05627200  | -1.86331200 |
| H  | 2.11512400  | 2.36448300  | -0.68085000 |
| O  | 2.67000000  | 0.51252300  | 0.13226400  |
| H  | 3.55868800  | 0.86120400  | 0.25802200  |
| Na | 1.64069700  | -1.57581400 | 0.61297000  |

### **$\beta$ -SG4 (-H<sub>2</sub>O)**

|   |            |             |             |
|---|------------|-------------|-------------|
| C | 0.76541200 | 1.00991300  | -0.81538000 |
| C | 0.29590800 | 1.30418000  | 0.63748000  |
| C | 0.56161200 | -1.04954900 | 1.25494800  |
| C | 1.45527000 | -1.25224200 | 0.05069000  |
| C | 0.81453100 | -0.50681000 | -1.13505000 |
| H | 1.11543200 | 1.79314400  | 1.16581700  |
| H | 0.41695100 | -1.79163000 | 2.03530800  |

|    |             |             |             |
|----|-------------|-------------|-------------|
| H  | 1.55557800  | -2.31539700 | -0.16821700 |
| H  | 1.47777200  | -0.61990200 | -2.00645300 |
| H  | 0.03201700  | 1.43419900  | -1.50187800 |
| O  | 0.07005800  | 0.07575200  | 1.51522800  |
| O  | -1.43519100 | -2.35141400 | 0.44502200  |
| H  | -1.53825400 | -3.30946400 | 0.45692800  |
| O  | 2.70005000  | -0.66072100 | 0.45457200  |
| H  | 3.35424300  | -1.33569600 | 0.67020900  |
| O  | -0.45117700 | -1.00960400 | -1.32670100 |
| H  | -0.92450100 | -2.03298100 | -0.40834500 |
| O  | 1.96997400  | 1.70917600  | -1.05677500 |
| H  | 2.70813600  | 1.20412700  | -0.69113200 |
| C  | -0.93635700 | 2.15829700  | 0.82420600  |
| H  | -1.15016700 | 2.27220200  | 1.89082700  |
| H  | -0.69588700 | 3.14035300  | 0.40403900  |
| O  | -2.08015200 | 1.59740300  | 0.15359300  |
| H  | -2.78484600 | 2.25507500  | 0.18098100  |
| Na | -2.49938400 | -0.50559000 | -0.76445000 |
